# Supplementary material for: Maturation of Purkinje cell firing properties relies on neurogenesis of excitatory neurons
Source: eLife. 2021 Sep 20;10:e68045. doi: 10.7554/eLife.68045 (PMC8452305; doi:10.7554/eLife.68045)
Supplement: Figure 1—figure supplement 4—source data 1. [file elife-68045-fig1-figsupp4-data1.xlsx]

## Sheet: Tbr2+ cells
Mouse ID	Section Number	Positive Cells		Genotype	MouseID	Count	CellNum
Ctrl_1S	1	388		Ctrl	Ctrl_1S	2517	20136
Ctrl_1S	2	132		Ctrl	Ctrl_2S	2504	20032	Average Ctrl
Ctrl_1S	3	236		Ctrl	Ctrl_1C	3967	23802	21323.3
Ctrl_1S	4	113		cKO	cKO_3C	470	2820
Ctrl_1S	5	695		cKO	cKO1_S	328	2624	Average cKO		Fold Change
Ctrl_1S	6	212		cKO	cKO2_S	342	2736	2726.67		7.82029
Ctrl_1S	7	163
Ctrl_1S	8	479				ttest	0.000115534
Ctrl_1S	9	99
Ctrl_2S	1	260
Ctrl_2S	2	148
Ctrl_2S	3	717
Ctrl_2S	4	303
Ctrl_2S	5	69
Ctrl_2S	6	422
Ctrl_2S	7	585
Ctrl_1C	1	318
Ctrl_1C	2	347
Ctrl_1C	3	649
Ctrl_1C	4	505
Ctrl_1C	5	321
Ctrl_1C	6	988
Ctrl_1C	7	424
Ctrl_1C	8	415
Ctrl_3C	1	1247
Ctrl_3C	2	1040
Ctrl_3C	3	327
Ctrl_3C	4	303
Ctrl_3C	5	598
Ctrl_3C	6	442
Ctrl_3C	7	789
Ctrl_3C	8	531
Ctrl_3C	9	523
cKO1_S	1-001	36
cKO1_S	2-001	32
cKO1_S	3-001	36
cKO1_S	4-002	22
cKO1_S	5-001	28
cKO1_S	6-002	5
cKO1_S	7-003	13
cKO1_S	8-001	61
cKO1_S	9-001	43
cKO1_S	10-001	52
cKO2_S	1	44
cKO2_S	2	32
cKO2_S	3	41
cKO2_S	4	14
cKO2_S	5	17
cKO2_S	6	26
cKO2_S	7	55
cKO2_S	8	20
cKO2_S	9	39
cKO2_S	10	54
cKO_3C	1-007	7
cKO_3C	1-008	2
cKO_3C	2-007/008	133
cKO_3C	3-001	41
cKO_3C	3-002	10
cKO_3C	4-001/002/003/004	55
cKO_3C	5-001/002	85
cKO_3C	6-001/002/003	137

## Sheet: NFH+;Calbindin- cells
Mouse ID	Section Number	Positive Cells		Genotype	MouseID	Count	CellNum
Ctrl_1C	1001	2		Ctrl	Ctrl_1C	762	4572
Ctrl_1C	2001/2002	72		Ctrl	Ctrl_2C	551	3306	Average Ctrl
Ctrl_1C	2003/2004	99		Ctrl	Ctrl_3C	496	2976	3618
Ctrl_1C	3001	44		cKO	cKO_1C	129	774
Ctrl_1C	3002	16		cKO	cKO_1S	96	768	Average cKO		Fold Change
Ctrl_1C	4001	39		cKO	cKO_2S	97	776	772.667		4.68248
Ctrl_1C	4002/4003	41
Ctrl_1C	5001/5002/5003	83				ttest	0.00426062
Ctrl_1C	5004	52
Ctrl_1C	6001	0
Ctrl_1C	7001	54
Ctrl_1C	7002	42
Ctrl_1C	8001/8002/8003/8004	117
Ctrl_1C	8005/8006/8007	101
Ctrl_2C	1001	52
Ctrl_2C	1002	63
Ctrl_2C	1003	48
Ctrl_2C	1004	44
Ctrl_2C	2001/2002	0
Ctrl_2C	2003/2004	29
Ctrl_2C	3001/3002	69
Ctrl_2C	3003/3004/3005	73
Ctrl_2C	3006	42
Ctrl_2C	4001	67
Ctrl_2C	4002	64
Ctrl_3C	1001/1002	54
Ctrl_3C	1003/1004	49
Ctrl_3C	2001	36
Ctrl_3C	2002	10
Ctrl_3C	3001/3002/3003/3004/3005/3006	71
Ctrl_3C	3007	58
Ctrl_3C	4001	42
Ctrl_3C	4002	19
Ctrl_3C	5001/5002/5003	70
Ctrl_3C	5004/5005	54
Ctrl_3C	6001	11
Ctrl_3C	6002	22
cKO_1C	1001/2/3	4
cKO_1C	2001/2/3/4/5	21
cKO_1C	3001-02-03	3
cKO_1C	4001/2/3/4	10
cKO_1C	5001/2/3/4/5/6/7/8	91
cKO_2S	1	0
cKO_2S	2	15
cKO_2S	3	20
cKO_2S	4	2
cKO_2S	5	4
cKO_2S	6	20
cKO_2S	7	8
cKO_2S	8	0
cKO_2S	9	12
cKO_2S	10	0
cKO_2S	11	0
cKO_2S	12	16
cKO_2S	13	0
cKO_1S	1	10
cKO_1S	2	6
cKO_1S	3	0
cKO_1S	4	5
cKO_1S	5	0
cKO_1S	6	13
cKO_1S	7	14
cKO_1S	8	18
cKO_1S	9	0
cKO_1S	10	3
cKO_1S	11	27
cKO_1S	12	0
