# Supplementary material for: Maturation of Purkinje cell firing properties relies on neurogenesis of excitatory neurons
Source: eLife. 2021 Sep 20;10:e68045. doi: 10.7554/eLife.68045 (PMC8452305; doi:10.7554/eLife.68045)
Supplement: Figure 3—source data 1. [file elife-68045-fig3-data1.xlsx]

## Sheet: Sholl analysis
Genotype	MouseNum	CellNum	0	20	40	60	80	100	120	140	160	180	200	220		Xmax	Ymax
ctrl	1	1	0	1	6	13	7	11	8	5	3	0	0	0		60	13
ctrl	1	2	0	1	7	13	17	20	28	32	24	0	0	0		140	32
ctrl	1	3	0	4	6	18	19	22	22	4	0	0	0	0		110	22
ctrl	1	4	0	3	18	26	30	17	27	24	14	0	0	0		80	30
ctrl	1	5	0	1	0	8	16	8	22	20	17	10	9	5		120	22
ctrl	1	6	0	1	2	9	18	22	26	25	12	0	0	0		120	26
ctrl	1	7	0	3	3	14	11	7	7	0	0	0	0	0		60	14
ctrl	1	8	0	1	5	7	13	13	24	12	5	1	0	0		120	24
ctrl	1	9	0	1	9	20	25	27	10	0	0	0	0	0		100	27
ctrl	1	10	0	6	13	18	20	17	21	7	8	7	0	0		120	21
ctrl	2	1	0	5	13	17	24	23	29	16	1	0	1	0		120	29
ctrl	2	2	0	4	12	22	19	21	7	0	0	0	0	0		60	22
ctrl	2	3	0	2	9	13	15	32	26	17	2	0	0	0		100	32
ctrl	2	4	0	5	15	15	19	28	10	0	0	0	0	0		100	28
ctrl	2	5	0	5	14	18	12	25	22	2	0	0	0	0		100	25
ctrl	2	6	0	2	12	20	20	13	15	5	3	0	0	0		70	20
ctrl	2	7	0	3	9	13	27	28	21	19	16	7	0	0		100	28
ctrl	2	8	0	1	4	19	16	16	14	2	0	0	0	0		90	19
ctrl	2	9	0	2	13	11	20	21	14	0	0	0	0	0		100	21
ctrl	2	10	0	1	10	23	11	14	10	11	2	0	0	0		60	23
ctrl	3	1	0	2	15	13	21	26	17	17	16	3	0	0		100	26
ctrl	3	2	0	4	17	17	22	25	7	5	5	4	0	0		100	25
ctrl	3	3	0	3	12	19	14	23	13	2	0	0	0	0		60	23
ctrl	3	4	0	8	13	14	21	28	36	12	2	0	0	0		120	36
ctrl	3	5	0	7	10	17	24	30	32	21	3	0	0	0		120	32
ctrl	3	6	0	1	3	9	24	21	16	4	0	0	0	0		80	24
ctrl	3	7	0	2	10	25	31	31	12	2	0	0	0	0		100	31
ctrl	3	8	0	3	14	10	26	25	28	25	2	0	0	0		120	28
ctrl	3	9	0	2	9	10	12	19	25	24	16	5	0	0		120	25
ctrl	3	10	0	3	7	12	22	10	15	3	0	0	0	0		80	22
cko	4	1	0	6	4	6	7	1	0	0	0	0	0	0		80	7
cko	4	2	0	4	9	7	8	13	4	2	0	0	0	0		100	13
cko	4	3	0	3	7	11	8	0	0	0	0	0	0	0		60	11
cko	4	4	0	4	8	5	7	1	1	2	2	1	0	0		40	8
cko	4	5	0	5	9	9	10	2	0	0	0	0	0	0		80	10
cko	4	6	0	1	4	2	7	2	2	0	0	0	0	0		80	7
cko	4	7	0	3	7	2	1	0	0	0	0	0	0	0		40	7
cko	4	8	0	6	9	6	0	0	0	0	0	0	0	0		40	9
cko	4	9	0	2	7	7	9	4	8	0	0	0	0	0		80	9
cko	4	10	0	3	6	5	1	0	0	0	0	0	0	0		40	6
cko	5	1	0	2	4	6	4	0	0	0	0	0	0	0		60	6
cko	5	2	0	2	11	12	9	4	0	0	0	0	0	0		60	12
cko	5	3	0	1	5	10	9	3	0	0	0	0	0	0		60	10
cko	5	4	0	3	4	3	6	0	0	0	0	0	0	0		80	6
cko	5	5	0	5	10	2	1	0	0	0	0	0	0	0		40	10
cko	5	6	0	5	7	7	6	0	0	0	0	0	0	0		50	7
cko	5	7	0	1	2	6	11	6	6	2	0	0	0	0		80	11
cko	5	8	0	2	9	7	6	1	0	0	0	0	0	0		40	9
cko	5	9	0	1	6	12	5	0	0	0	0	0	0	0		60	12
cko	5	10	0	2	6	13	13	3	0	0	0	0	0	0		70	13
cko	6	1	0	2	5	13	10	4	0	0	0	0	0	0		60	13
cko	6	2	0	1	3	4	8	7	2	0	0	0	0	0		80	8
cko	6	3	0	1	1	6	12	5	3	0	0	0	0	0		80	12
cko	6	4	0	1	5	8	4	1	0	0	0	0	0	0		60	8
cko	6	5	0	2	5	6	7	4	2	0	0	0	0	0		80	7
cko	6	6	0	5	6	10	7	0	0	0	0	0	0	0		60	10
cko	6	7	0	1	3	7	3	2	0	0	0	0	0	0		60	7
cko	6	8	0	1	4	7	9	3	0	0	0	0	0	0		80	9
cko	6	9	0	1	2	4	7	6	2	0	0	0	0	0		80	7
cko	6	10	0	3	2	8	11	2	0	0	0	0	0	0		80	11

## Sheet: Spine density
genotype	mouse	Image #	dendrite #	length	spine #	spines/um
ctrl	ctrl1	1	1	36.977	50	1.35219
ctrl	ctrl1	2	1	12.3923	31	2.50155
ctrl	ctrl1	2	2	14.2122	24	1.68869
ctrl	ctrl1	2	3	21.9481	40	1.82248
ctrl	ctrl1	3	1	24.386	57	2.33741
ctrl	ctrl1	3	2	19.3472	46	2.37761
ctrl	ctrl1	4	1	21.1076	40	1.89505
ctrl	ctrl1	4	2	12.5518	32	2.54944
ctrl	ctrl1	4	3	15.7841	31	1.964
ctrl	ctrl1	5	1	17.1528	35	2.04048
ctrl	ctrl1	5	2	16.3171	34	2.0837
ctrl	ctrl2	1	1	13.0198	25	1.92015
ctrl	ctrl2	1	2	16.3256	26	1.59259
ctrl	ctrl2	2	1	16.6571	31	1.86107
ctrl	ctrl2	3	1	17.4274	30	1.72143
ctrl	ctrl2	3	2	7.6462	15	1.96176
ctrl	ctrl2	3	3	6.4011	14	2.18712
ctrl	ctrl2	3	4	8.8907	17	1.91211
ctrl	ctrl2	4	1	30.8601	60	1.94426
ctrl	ctrl2	4	2	15.2926	39	2.55025
ctrl	ctrl2	5	1	20.61	43	2.08637
ctrl	ctrl2	5	2	15.0389	31	2.06132
ctrl	ctrl3	1	1	18.758	31	1.65263
ctrl	ctrl3	1	2	26.8735	53	1.9722
ctrl	ctrl3	1	3	21.4632	50	2.32957
ctrl	ctrl3	3	1	21.0401	34	1.61596
ctrl	ctrl3	3	2	13.0139	32	2.45891
ctrl	ctrl3	4	1	12.2546	22	1.79524
ctrl	ctrl3	4	2	18.7464	39	2.0804
ctrl	ctrl3	2	1	7.7119	17	2.20439
ctrl	ctrl3	2	2	10.3477	21	2.02944
ctrl	ctrl3	2	3	9.5219	23	2.41548
ctrl	ctrl3	5	1	11.942	28	2.34467
ctrl	ctrl3	5	2	10.8597	19	1.74959
ctrl	ctrl3	5	3	9.7701	21	2.14942
cko	cko1	1	1	48.3108	62	1.28336
cko	cko1	2	1	29.5318	45	1.52378
cko	cko1	3	1	34.8143	56	1.60853
cko	cko1	5	1	25.7359	37	1.43768
cko	cko2	1	1	26.4284	49	1.85407
cko	cko2	2	1	74.1271	102	1.37601
cko	cko2	3	1	32.8032	61	1.85957
cko	cko2	4	1	30.83	57	1.84885
cko	cko2	5	1	32.4963	49	1.50786
cko	cko2	6	1	37.9865	54	1.42156
cko	cko3	1	1	16.7025	28	1.6764
cko	cko3	2	1	29.3089	45	1.53537
cko	cko3	3	1	16.7429	27	1.61262
cko	cko3	4	1	19.1078	22	1.15136
cko	cko3	4	2	23.6037	37	1.56755
cko	cko3	5	1	15.3548	25	1.62816
cko	cko3	5	2	13.4018	29	2.16389

## Sheet: Statistics (LMM)
Linear mixed-effects model fit by ML									Linear mixed-effects model fit by ML									Linear mixed-effects model fit by ML
Model information:									Model information:									Model information:
Number of observations 60									Number of observations 60									Number of observations 52
Fixed effects coefficients 2									Fixed effects coefficients 2									Fixed effects coefficients 2
Random effects coefficients 6									Random effects coefficients 6									Random effects coefficients 6
Covariance parameters 2									Covariance parameters 2									Covariance parameters 2
Formula:									Formula:									Formula:
Xmax ~ 1 + Genotype + (1 | MouseNum)									Ymax ~ 1 + Genotype + (1 | MouseNum)									spinesum ~ 1 + genotype + (1 | mouse)
Model fit statistics:									Model fit statistics:									Model fit statistics:
AIC BIC LogLikelihood Deviance									AIC BIC LogLikelihood Deviance									AIC BIC LogLikelihood Deviance
536.45 544.83 -264.23 528.45									342.73 351.11 -167.37 334.73									21.847 29.652 -6.9233 13.847
Fixed effects coefficients (95% CIs):									Fixed effects coefficients (95% CIs):									Fixed effects coefficients (95% CIs):
Name Estimate SE tStat DF pValue Lower Upper									Name Estimate SE tStat DF pValue Lower Upper									Name Estimate SE tStat DF pValue Lower Upper
'(Intercept)' 97.667 3.612 27.04 58 1.4327e-34 90.437 104.9									'(Intercept)' 25 0.71886 34.777 58 1.5223e-40 23.561 26.439									{'(Intercept)' } 1.5918 0.067044 23.742 50 6.9762e-29 1.4571 1.7264
'Genotype_cko' -32.333 5.1081 -6.3298 58 3.8733e-08 -42.558 -22.108									'Genotype_cko' -15.833 1.0166 -15.574 58 2.2001e-22 -17.868 -13.798									{'genotype_ctrl'} 0.44252 0.08172 5.4151 50 1.7473e-06 0.27838 0.60666
Random effects covariance parameters (95% CIs):									Random effects covariance parameters (95% CIs):									Random effects covariance parameters (95% CIs):
Group: MouseNum (6 Levels)									Group: MouseNum (6 Levels)									Group: mouse (6 Levels)
Name1 Name2 Type Estimate Lower Upper									Name1 Name2 Type Estimate Lower Upper									Name1 Name2 Type Estimate Lower Upper
'(Intercept)' '(Intercept)' 'std' 4.3928e-15 NaN NaN									'(Intercept)' '(Intercept)' 'std' 8.7427e-16 NaN NaN									{'(Intercept)'} {'(Intercept)'} {'std'} 0 NaN NaN
Group: Error									Group: Error									Group: Error
Name Estimate Lower Upper									Name Estimate Lower Upper									Name Estimate Lower Upper
'Res Std' 19.784 16.542 23.66									'Res Std' 3.9374 3.2923 4.7088									{'Res Std'} 0.27643 0.2281 0.33501
