# Supplementary material for: Maturation of Purkinje cell firing properties relies on neurogenesis of excitatory neurons
Source: eLife. 2021 Sep 20;10:e68045. doi: 10.7554/eLife.68045 (PMC8452305; doi:10.7554/eLife.68045)
Supplement: Figure 4—source data 1. [file elife-68045-fig4-data1.xlsx]

## Sheet: Vglut1
FileName	MouseID	Genotype	Age	%Area		Age	Genotype	MouseID	Area	Group Average
P14_Vglut1_cKO1-1_c1+2	cKO1	cKO	P14	1.751		P7	Control	Ctrl1	10.9868
P14_Vglut1_cKO1-2_c1+2	cKO1	cKO	P14	2.153		P7	Control	Ctrl2	6.125
P14_Vglut1_cKO1-3_c1+2	cKO1	cKO	P14	2.574		P7	Control	Ctrl3	7.31575	8.14252
P14_Vglut1_cKO1-4_c1+2	cKO1	cKO	P14	1.741		P7	cKO	cKO1	0.918
P14_Vglut1_cKO1-5_c1+2	cKO1	cKO	P14	3.714		P7	cKO	cKO2	1.227		Fold-Change
P14_Vglut1_cKO2-1_c1+1	cKO2	cKO	P14	3.886		P7	cKO	cKO3	0.498167	0.881056	9.24177
P14_Vglut1_cKO2-2_c1+2	cKO2	cKO	P14	2.071		P14	Control	Ctrl1	17.2752
P14_Vglut1_cKO2-3_c1+2	cKO2	cKO	P14	3.127		P14	Control	Ctrl2	21.7007
P14_Vglut1_cKO2-5_c1+2	cKO2	cKO	P14	1.867		P14	Control	Ctrl3	21.7094	20.2284
P14_Vglut1_cKO3-1_c1+1	cKO3	cKO	P14	0.748		P14	cKO	cKO1	2.3866
P14_Vglut1_cKO3-2_c1+2	cKO3	cKO	P14	2.397		P14	cKO	cKO2	2.73775		Fold-Change
P14_Vglut1_cKO3-3_c1+2	cKO3	cKO	P14	2.225		P14	cKO	cKO3	1.90875	2.34437	8.62854
P14_Vglut1_cKO3-4_c1+2	cKO3	cKO	P14	2.265
P14_Vglut1_Ctrl1-1_c1+2	Ctrl1	Ctrl	P14	17.163
P14_Vglut1_Ctrl1-2_c1+2	Ctrl1	Ctrl	P14	22.622
P14_Vglut1_Ctrl1-3_c1+2	Ctrl1	Ctrl	P14	13.598
P14_Vglut1_Ctrl1-4_c1+2	Ctrl1	Ctrl	P14	16.796
P14_Vglut1_Ctrl1-5_c1+2	Ctrl1	Ctrl	P14	16.197
P14_Vglut1_Ctrl2-2_c1+2	Ctrl2	Ctrl	P14	24.521
P14_Vglut1_Ctrl2-3_c1+2	Ctrl2	Ctrl	P14	24.401
P14_Vglut1_Ctrl2-4_c1+2	Ctrl2	Ctrl	P14	17.869
P14_Vglut1_Ctrl2-5_c1+2	Ctrl2	Ctrl	P14	20.012
P14_Vglut1_Ctrl3-1_c1+2	Ctrl3	Ctrl	P14	20.521
P14_Vglut1_Ctrl3-2_c1+2	Ctrl3	Ctrl	P14	21.941
P14_Vglut1_Ctrl3-3_c1+2	Ctrl3	Ctrl	P14	23.095
P14_Vglut1_Ctrl3-4_c1+2	Ctrl3	Ctrl	P14	22.818
P14_Vglut1_Ctrl3-5_c1+2	Ctrl3	Ctrl	P14	20.172
P7_Vglut1_cKO1-1_c1+2	cKO1	cKO	P7	0.745
P7_Vglut1_cKO1-2_c1+2	cKO1	cKO	P7	1.026
P7_Vglut1_cKO1-3_c1+2	cKO1	cKO	P7	0.963
P7_Vglut1_cKO1-4_c1+2	cKO1	cKO	P7	1.499
P7_Vglut1_cKO1-5_c1+2	cKO1	cKO	P7	0.357
P7_Vglut1_cKO2-1_c1+2	cKO2	cKO	P7	2.496
P7_Vglut1_cKO2-2_c1+2	cKO2	cKO	P7	0.681
P7_Vglut1_cKO2-3_c1+2	cKO2	cKO	P7	1.009
P7_Vglut1_cKO2-4_c1+2	cKO2	cKO	P7	0.722
P7_Vglut1_cKO2-5_c1+2	cKO3	cKO	P7	0.437
P7_Vglut1_cKO3-1_c1+2	cKO3	cKO	P7	0.733
P7_Vglut1_cKO3-2_c1+2	cKO3	cKO	P7	0.605
P7_Vglut1_cKO3-3_c1+2	cKO3	cKO	P7	0.743
P7_Vglut1_cKO3-4_c1+2	cKO3	cKO	P7	0.171
P7_Vglut1_cKO3-5_c1+2	cKO3	cKO	P7	0.3
P7_Vglut1_Ctrl-1-1_c1+2	Ctrl1	Ctrl	P7	10.411
P7_Vglut1_Ctrl-1-2_c1+2	Ctrl1	Ctrl	P7	10.844
P7_Vglut1_Ctrl-1-3_c1+2	Ctrl1	Ctrl	P7	8.374
P7_Vglut1_Ctrl-1-4_c1+2	Ctrl1	Ctrl	P7	11.351
P7_Vglut1_Ctrl-1-5_c1+2	Ctrl1	Ctrl	P7	13.954
P7_Vglut1_Ctrl-2-1_c1+1	Ctrl2	Ctrl	P7	4.698
P7_Vglut1_Ctrl-2-2_c1+2	Ctrl2	Ctrl	P7	5.497
P7_Vglut1_Ctrl-2-3_c1+2	Ctrl2	Ctrl	P7	10.934
P7_Vglut1_Ctrl-2-5_c1+2	Ctrl2	Ctrl	P7	3.371
P7_Vglut1_Ctrl-3-1_c1+1	Ctrl3	Ctrl	P7	4.791
P7_Vglut1_Ctrl-3-3_c1+2	Ctrl3	Ctrl	P7	6.693
P7_Vglut1_Ctrl-3-4_c1+2	Ctrl3	Ctrl	P7	9.996
P7_Vglut1_Ctrl-3-5_c1+2	Ctrl3	Ctrl	P7	7.783

## Sheet: Stats
Source Sum Sq. d.f. Mean Sq. F Prob>F
------------------------------------------------------
X1 474.224 1 474.224 142.94 0
X2 137.687 1 137.687 41.5 0.0002
X1*X2 84.63 1 84.63 25.51 0.001
Error 26.54 8 3.318
Total 723.081 11
X1=Genotype
X2=Age
Post-Hoc
Group1	Group2	P-value
Ctrl P7	cKO P7	0.0053
Ctrl P7	Ctrl P14	0.0002
Ctrl P7	cKO P14	0.0191
cKO P7	Ctrl P14	<0.0001
cKO P7	cKO P14	0.7623
Ctrl P14	cKO P14	<0.0001
