# Supplementary material for: Maturation of Purkinje cell firing properties relies on neurogenesis of excitatory neurons
Source: eLife. 2021 Sep 20;10:e68045. doi: 10.7554/eLife.68045 (PMC8452305; doi:10.7554/eLife.68045)
Supplement: Figure 5—source data 1. [file elife-68045-fig5-data1.xlsx]

## Sheet: ePhys SS data P7-14 (F5+F6)
CellID	Type	CellNum	MouseID	Genotype	Age	Age Group	RecordTime	SpikeNum	Freq	CV	CV2	mode	PausePercent	RhythmIndex
32	PC	1	P7_190124	ctrl	P7	Ctrl-p07-08	284.933	250	0.835284	2.63758	1.05068	1.25	0.694096	0
34	PC	1	P7_190212	ctrl	P7	Ctrl-p07-08	292.829	261	0.812761	2.32705	1.08632	1.25	0.636705	0
50	PC	4	P7_191010	ctrl	P7	Ctrl-p07-08	161.942	304	1.67961	2.58896	0.629938	6.25	0.499835	0.0472509
51	PC	5	P7_191010	ctrl	P7	Ctrl-p07-08	130.215	358	2.51122	1.9605	0.309419	6.25	0.237347	0.123818
61	PC	4	P7_191018	ctrl	P7	Ctrl-p07-08	198.792	590	2.49003	2.19698	0.538989	13.75	0.49155	0.309122
119	PC	1	P7_200110	ctrl	P7	Ctrl-p07-08	292.53	372	1.24773	2.84845	0.701253	3.75	0.253811	0
120	PC	2	P7_200110	ctrl	P7	Ctrl-p07-08	299.109	242	0.805725	1.43353	0.515402	1.25	0.152298	0
121	PC	3	P7_200110	ctrl	P7	Ctrl-p07-08	299.287	275	0.91551	1.32836	0.274574	1.25	0.103187	0
125	PC	9	P7_200129	ctrl	P7	Ctrl-p07-08	109.969	1340	12.1034	0.280008	0.170274	13.75	0	0.450372
126	PC	5	P7_200129	ctrl	P7	Ctrl-p07-08	199.373	673	3.37057	0.605554	0.205223	3.75	0.0218187	0.13018
151	PC	1	P7_191018	ctrl	P7	Ctrl-p07-08	228.405	651	2.8502	2.5689	0.125367	3.75	0.136865	0.104149
37	PC	1	P8_190225	ctrl	P8	Ctrl-p07-08	149.516	345	1.9864	0.675567	0.751421	3.75	0	0.0240132
38	PC	2	P8_190225	ctrl	P8	Ctrl-p07-08	123.549	971	7.79447	2.98446	0.222951	11.25	0.124	0.0460247
127	PC	4	P8_200218	ctrl	P8	Ctrl-p07-08	199.492	562	2.79209	0.791648	0.107646	3.75	0.060899	0.12698
128	PC	5	P8_200219	ctrl	P8	Ctrl-p07-08	229.783	615	2.66773	0.196643	0.144272	3.75	0	0.101839
129	PC	6	P8_200220	ctrl	P8	Ctrl-p07-08	204.4	648	3.16047	1.31362	0.251648	3.75	0.0820163	0.107997
134	PC	1	P8_200219	ctrl	P8	Ctrl-p07-08	99.6274	305	2.91085	1.05632	0.156704	3.75	0.125898	0.0600991
135	PC	3	P8_200219-2	ctrl	P8	Ctrl-p07-08	239.848	404	1.54681	2.5166	0.415547	3.75	0.320604	0
139	PC	4	P8_200311	ctrl	P8	Ctrl-p07-08	149.723	969	6.43855	0.376916	0.280171	6.25	0	0.0450644
140	PC	4	P8_200311-2	ctrl	P8	Ctrl-p07-08	263.611	885	3.33825	0.370832	0.171666	3.75	0	0.128992
141	PC	5	P8_200311-2	ctrl	P8	Ctrl-p07-08	198.303	327	1.4372	3.56277	0.403054	3.75	0.275681	0
142	PC	6	P8_200311	ctrl	P8	Ctrl-p09-10	149.568	813	5.34206	0.548194	0.249408	8.75	0	0.202566
72	PC	6	P9_191120	ctrl	P9	Ctrl-p09-10	119.971	846	7.01837	0.735194	0.636345	6.25	0.0189491	0.0639806
73	PC	8	P9_191120	ctrl	P9	Ctrl-p09-10	119.769	1533	12.3488	0.77319	0.729415	11.25	0.00366155	0
74	PC	9	P9_191120	ctrl	P9	Ctrl-p09-10	99.9259	1879	16.8625	0.832894	0.753159	11.25	0.0167008	0.0676425
75	PC	1	P9_191120	ctrl	P9	Ctrl-p09-10	149.908	1190	7.91818	0.450392	0.337872	11.25	0	0.12411
118	PC	4	P9_M1_200108	ctrl	P9	Ctrl-p09-10	149.874	1548	10.1352	0.784228	0.827059	8.75	0.0211101	0.0503679
130	PC	7	P9_200218	ctrl	P9	Ctrl-p09-10	143.963	545	3.77182	3.2762	0.193226	6.25	0.258316	0.0399955
131	PC	6	P9_200218	ctrl	P9	Ctrl-p09-10	100.523	186	1.78069	1.48276	0.319306	3.75	0.229399	0.051588
132	PC	5	P9_200218	ctrl	P9	Ctrl-p09-10	204.956	897	4.33751	0.964511	0.343688	3.75	0.0508168	0.0289675
133	PC	3	P9_200218	ctrl	P9	Ctrl-p09-10	209.666	567	2.65183	0.909815	0.165613	3.75	0.0798598	0.099845
143	PC	6	P9_200312F3	ctrl	P9	Ctrl-p09-10	208.705	1057	5.05497	1.90194	0.445548	13.75	0.156251	0.145627
144	PC	5	P9_200312F3	ctrl	P9	Ctrl-p09-10	210.225	574	2.71614	0.790004	0.30396	3.75	0.0199309	0.0591653
145	PC	4	P9_200312F3	ctrl	P9	Ctrl-p09-10	198.763	328	1.64517	0.877635	0.783737	3.75	0.0494865	0
146	PC	2	P9_200312F3	ctrl	P9	Ctrl-p09-10	199.332	375	1.88129	1.04341	0.271903	3.75	0.104042	0.0532587
147	PC	7	P9_200312F4	ctrl	P9	Ctrl-p09-10	201.059	626	3.11351	3.3751	0.348941	11.25	0.574735	0.302268
148	PC	5	P9_200312F4	ctrl	P9	Ctrl-p09-10	148.095	919	6.10417	4.33589	0.212477	11.25	0.403651	0.161299
149	PC	6	P9_200312F4	ctrl	P9	Ctrl-p09-10	99.8768	874	8.10999	3.01923	0.261451	13.75	0.256791	0.237561
49	PC	2	P10_191008	ctrl	P10	Ctrl-p09-10	199.445	1597	7.9922	1.213	0.774687	3.75	0.0398487	0.050173
70	PC	3	P10_191028	ctrl	P10	Ctrl-p09-10	199.97	1151	4.65071	0.834155	0.805846	3.75	0.0237978	0.0684019
71	PC	4	P10_191028	ctrl	P10	Ctrl-p09-10	199.047	789	3.89857	1.11074	0.818234	3.75	0.0699289	0
76	PC	1	P10_191125	ctrl	P10	Ctrl-p09-10	99.9407	932	8.98532	0.494842	0.258487	11.25	0	0.191228
86	PC	4	P10_191212	ctrl	P10	Ctrl-p09-10	152.977	766	4.83731	0.418708	0.170551	6.25	0	0.120849
87	PC	6	P10_191212	ctrl	P10	Ctrl-p09-10	199.921	2951	8.93853	2.51157	0.184469	13.75	0.251372	0.170248
88	PC	3	P10_191212	ctrl	P10	Ctrl-p09-10	149.928	1571	7.25684	5.26386	0.283887	18.75	0.575722	0.0785946
89	PC	1	P10_191212	ctrl	P10	Ctrl-p09-10	149.939	2043	12.5318	0.954223	0.245211	16.25	0.108005	0.636369
122	PC	3	P10_200128	ctrl	P10	Ctrl-p09-11	199.904	1337	6.65319	0.373433	0.293537	8.75	0	0.0422282
123	PC	4	P10_200128	ctrl	P10	Ctrl-p09-10	179.928	1416	7.8698	0.29282	0.163548	8.75	0	0.356481
124	PC	9	P10_200128	ctrl	P10	Ctrl-p09-10	99.8834	1014	9.5211	0.308472	0.18303	11.25	0	0.440962
136	PC	3	P10_200113	ctrl	P10	Ctrl-p09-10	149.961	1113	7.18854	1.1392	0.396821	11.25	0.170436	0.164746
137	PC	2	P10_191101	ctrl	P10	Ctrl-p09-10	109.059	669	6.1251	0.911166	0.759615	6.25	0.0281093	0.0384834
152	PC	5	P10_191212	ctrl	P10	Ctrl-p09-10	99.9404	857	8.11484	1.84042	0.249097	11.25	0.22129	0.153105
30	PC	2	P11_190118	ctrl	P11	Ctrl-p11-12	299.95	8795	28.9715	4.43466	0.137831	38.75	0.227576	0.699401
31	PC	2	P11_190118	ctrl	P11	Ctrl-p11-12	299.96	2623	8.74118	1.13394	0.512941	11.25	0.144157	0.038394
33	PC	1	P11_190207	ctrl	P11	Ctrl-p11-12	295.82	1739	5.70279	4.72994	0.436531	13.75	0.373217	0.0524254
52	PC	1	P10_191014	ctrl	P11	Ctrl-p11-12	199.88	2255	11.2818	0.317923	0.209638	13.75	0	0.578187
53	PC	6	P10_191014	ctrl	P11	Ctrl-p11-12	199.952	2002	9.9524	0.318752	0.326068	11.25	0	0.0437529
54	PC	8	P10_191014	ctrl	P11	Ctrl-p11-12	199.948	9252	35.8844	0.625624	0.191239	41.25	0.0258091	0.836159
55	PC	10	P10_191014	ctrl	P11	Ctrl-p11-12	149.962	3090	20.6053	0.253204	0.177263	23.75	0	0.541373
90	PC	2	P11_F_191223	ctrl	P11	Ctrl-p11-12	116.744	1948	13.157	2.30854	0.253933	18.75	0.223966	0.245846
91	PC	3	P11_F_191223	ctrl	P11	Ctrl-p11-12	99.9649	1635	15.2353	0.953019	0.200192	18.75	0.0765809	0.84346
92	PC	4	P11_F_191223	ctrl	P11	Ctrl-p11-12	108.99	1478	12.9645	0.495911	0.23233	13.75	0.0142467	0.167499
93	PC	7	P11_F_191223	ctrl	P11	Ctrl-p11-12	102.755	1067	9.19663	1.94613	0.352834	11.25	0.149611	0.0458943
94	PC	8	P11_F2_191223	ctrl	P11	Ctrl-p11-12	99.1636	1433	14.0979	3.27241	0.20604	26.25	0.388916	0.986778
95	PC	6	P11_F2_191223	ctrl	P11	Ctrl-p11-12	99.6761	1235	11.748	3.7851	0.195116	21.25	0.368717	0.904132
96	PC	4	P11_F2_191223	ctrl	P11	Ctrl-p11-12	99.2526	1207	11.3146	2.4196	0.299906	18.75	0.321384	0.677767
97	PC	2	P11_F2_191223	ctrl	P11	Ctrl-p11-12	111.82	2275	14.4875	2.87636	0.222265	23.75	0.301653	1.09268
98	PC	3	P11_M3_191223	ctrl	P11	Ctrl-p11-12	129.933	1533	9.21242	4.10334	0.232858	16.25	0.359873	0.150197
99	PC	4	P11_M3_191223	ctrl	P11	Ctrl-p11-12	199.065	1362	6.5004	3.02209	0.395354	13.75	0.292982	0.284406
100	PC	5	P11_M3_191223	ctrl	P11	Ctrl-p11-12	134.501	2350	15.472	2.73193	0.362533	26.25	0.297941	0.285673
101	PC	3	P11_M4_200102	ctrl	P11	Ctrl-p11-12	165.393	1964	11.8747	1.36484	0.295773	16.25	0.214761	0.223757
102	PC	5	P11_M4_200102	ctrl	P11	Ctrl-p11-12	199.585	1116	5.59161	2.33106	0.557902	11.25	0.239008	0.067964
62	PC	1	P12_191023M	ctrl	P12	Ctrl-p11-12	199.303	2143	10.7374	1.10247	0.505395	18.75	0.114005	0.221008
63	PC	11	P12_191023M	ctrl	P12	Ctrl-p11-12	198.165	2238	11.1725	2.66225	0.479392	18.75	0.414888	0.135749
64	PC	8	P12_191023M	ctrl	P12	Ctrl-p11-12	98.3247	1729	14.5335	4.53653	0.239048	28.75	0.470097	0.271333
65	PC	2	P12_191023M	ctrl	P12	Ctrl-p11-12	99.9867	1604	15.7621	2.39386	0.318658	23.75	0.302003	0.623651
66	PC	2	P12_191023M2	ctrl	P12	Ctrl-p11-12	199.966	6353	31.1802	1.10715	0.189249	36.25	0.120494	1.00298
67	PC	3	P12_191023M2	ctrl	P12	Ctrl-p11-12	114.825	4057	34.7224	1.97825	0.172799	43.75	0.216854	1.05213
68	PC	5	P12_191023M2	ctrl	P12	Ctrl-p11-12	199.98	11203	29.538	1.13899	0.429256	43.75	0.156676	0.372889
69	PC	7	P12_191023M2	ctrl	P12	Ctrl-p11-12	199.926	6068	30.3262	0.94916	0.354099	43.75	0.101358	0.866758
82	PC	4	P12_191127	ctrl	P12	Ctrl-p11-12	199.308	1357	6.80355	1.60649	0.440394	13.75	0.219039	0.070629
83	PC	6	P12_191127	ctrl	P12	Ctrl-p11-12	206.194	1574	7.2262	1.49804	0.280836	11.25	0.268139	0.207319
84	PC	7	P12_191127	ctrl	P12	Ctrl-p11-12	149.962	2265	15.0372	1.32985	0.378652	23.75	0.212747	0.622945
85	PC	8	P12_191127	ctrl	P12	Ctrl-p11-12	99.819	574	5.56006	0.924044	0.424411	8.75	0.0484423	0.0725881
104	PC	3	P12_M3_200102	ctrl	P12	Ctrl-p11-12	199.944	1054	5.23146	5.5562	0.260717	16.25	0.598623	0.315697
105	PC	2	P12_M3_200102	ctrl	P12	Ctrl-p11-12	99.9496	2706	16.6484	5.15016	0.211812	33.75	0.476764	0.432499
150	PC	9	P12_191023M	ctrl	P12	Ctrl-p11-12	99.4223	1441	14.3529	1.70909	0.333412	21.25	0.268015	0.0680748
56	PC	1	P13F_19101	ctrl	P13	Ctrl-p13-14	199.735	2589	10.569	3.36544	0.2819	21.25	0.383526	0.753998
57	PC	4	P13F_19101	ctrl	P13	Ctrl-p13-14	199.935	2025	9.69314	4.81185	0.1738	18.75	0.453451	0.538634
59	PC	6	P13F_19101	ctrl	P13	Ctrl-p13-14	199.978	3110	12.7464	6.52375	0.231786	28.75	0.54805	0.182533
60	PC	8	P13F_19101	ctrl	P13	Ctrl-p13-14	199.567	3720	12.7376	5.93529	0.238465	33.75	0.537525	0.497313
106	PC	1	P13_F4_200104	ctrl	P13	Ctrl-p13-14	532.129	1880	3.50667	0.898278	0.342031	13.75	0.0465587	0.18827
107	PC	6	P13_F4_200104	ctrl	P13	Ctrl-p13-14	250.703	1721	6.59346	5.09656	0.212935	33.75	0.201533	1.01528
108	PC	7	P13_F4_200105	ctrl	P13	Ctrl-p13-14	109.537	1717	15.529	1.06808	0.474858	21.25	0.102609	0.142058
109	PC	8	P13_F4_200106	ctrl	P13	Ctrl-p13-14	99.9808	2582	21.4641	2.65636	0.337207	26.25	0.163835	0.362186
110	PC	1	P13_F3_200104	ctrl	P13	Ctrl-p13-14	142.388	2986	19.8822	4.17693	0.204564	33.75	0.353217	1.3781
111	PC	2	P13_F3_200104	ctrl	P13	Ctrl-p13-14	159.968	2310	14.2966	2.87937	0.297388	23.75	0.288952	0.158979
112	PC	3	P13_F3_200105	ctrl	P13	Ctrl-p13-14	119.958	2119	14.255	6.57905	0.218738	36.25	0.550312	0.585683
113	PC	6	P13_F3_200106	ctrl	P13	Ctrl-p13-14	99.9733	1721	16.5344	5.09656	0.212935	33.75	0.505384	1.01528
114	PC	1	P13_F2_200104	ctrl	P13	Ctrl-p13-14	182.355	3431	17.6853	1.83079	0.535461	28.75	0.341702	0.099307
115	PC	2	P13_F2_200104	ctrl	P13	Ctrl-p13-14	129.915	2649	20.2825	1.91405	0.34007	31.25	0.242304	0.419182
116	PC	3	P13_F2_200104	ctrl	P13	Ctrl-p13-14	139.86	1264	8.86601	2.1312	0.658772	18.75	0.372893	0.0867857
117	PC	4	P13_F2_200104	ctrl	P13	Ctrl-p13-14	149.413	2355	12.964	2.1438	0.544283	31.25	0.46482	0.292919
13	PC	1	ctrl2	ctrl	P14	Ctrl-p13-14	199.926	2058	10.2838	0.959207	0.373988	16.25	0.127297	0.17344
14	PC	5	ctrl2	ctrl	P14	Ctrl-p13-14	199.992	3760	18.7958	4.55448	0.200312	31.25	0.324957	0.711727
15	PC	6	ctrl2	ctrl	P14	Ctrl-p13-14	299.717	6213	20.7262	2.52582	0.17011	26.25	0.171486	0.796844
16	PC	1	ctrl3	ctrl	P14	Ctrl-p13-14	308.25	2346	7.6107	4.02711	0.27491	13.75	0.348527	0.156684
17	PC	3	ctrl3	ctrl	P14	Ctrl-p13-14	243.327	4351	17.7334	1.84442	0.209755	26.25	0.236931	0.753675
18	PC	1	ctrl4	ctrl	P14	Ctrl-p13-14	299.965	3282	10.9213	1.38071	0.397287	16.25	0.206215	0.122938
19	PC	2	ctrl4	ctrl	P14	Ctrl-p13-14	355.789	4297	12.0661	5.78394	0.136674	21.25	0.407237	0.477919
20	PC	3	ctrl4	ctrl	P14	Ctrl-p13-14	263.058	4394	16.6617	8.0207	0.123426	33.75	0.411997	0.763566
21	PC	1	ctrl5	ctrl	P14	Ctrl-p13-14	231.15	2895	12.494	2.11649	0.273227	21.25	0.343065	0.680079
22	PC	2	ctrl5	ctrl	P14	Ctrl-p13-14	226.788	2671	11.7731	5.14009	0.137865	21.25	0.393527	0.470379
23	PC	4	ctrl5	ctrl	P14	Ctrl-p13-14	200.235	2372	11.8361	6.07663	0.201997	26.25	0.516118	0.43282
24	PC	5	ctrl5	ctrl	P14	Ctrl-p13-14	251.895	3976	15.701	6.96046	0.216791	41.25	0.629331	0.200901
25	PC	3	ctrl6	ctrl	P14	Ctrl-p13-14	194.679	2763	14.1926	6.2448	0.134761	26.25	0.396239	0.31452
26	PC	4	ctrl6	ctrl	P14	Ctrl-p13-14	142.46	2848	19.9915	8.13983	0.182597	43.75	0.468216	0.311618
27	PC	1	ctrl7	ctrl	P14	Ctrl-p13-14	260.282	3323	12.7093	5.51251	0.150562	26.25	0.482129	0.346442
28	PC	2	ctrl7	ctrl	P14	Ctrl-p13-14	300.765	1838	6.0612	2.71975	0.331491	11.25	0.350275	0.0550774
185	PC	8	P10_cKO1M	cKO	P10	cKO-p10	300.332	3417	10.292	1.31623	0.998021	6.25	0.113784	0.0422556
186	PC	1	P10_cKO1M	cKO	P10	cKO-p10	107.861	701	6.28589	0.981797	1.03975	3.75	0.0174574	0
187	PC	4	P10_cKO1M	cKO	P10	cKO-p10	109.62	822	6.95129	1.07416	0.975547	6.25	0.0637978	0.0550875
188	PC	6	P10_cKO1M	cKO	P10	cKO-p10	199.541	1382	5.90354	1.35549	1.06638	3.75	0.128932	0
189	PC	5	P10_cKO2F	cKO	P10	cKO-p10	298.735	1068	3.49474	1.25712	0.826858	3.75	0.151378	0.0805699
190	PC	6	P10_cKO2F	cKO	P10	cKO-p10	300.493	1978	6.48601	1.33212	1.01288	6.25	0.146422	0.0333412
191	PC	7	P10_cKO2F	cKO	P10	cKO-p10	119.559	433	3.52127	1.05214	1.05975	3.75	0.0435721	0.0251168
192	PC	8	P10_cKO2F	cKO	P10	cKO-p10	198.471	529	2.46887	1.60227	0.961939	3.75	0.23679	0.0791676
193	PC	3	P10_cKO3M	cKO	P10	cKO-p10	99.8986	357	3.48353	0.944294	0.705838	3.75	0.0277978	0
194	PC	9	P10_cKO3M	cKO	P10	cKO-p10	98.2016	251	2.52542	1.19256	0.975384	1.25	0	0.225483
195	PC	6	P10_cKO3M	cKO	P10	cKO-p10	199.904	1349	6.55313	1.56283	0.304682	8.75	0.145332	0.0531521
196	PC	10	P10_cKO3M	cKO	P10	cKO-p10	149.727	525	3.46631	1.17729	0.942117	3.75	0.0610786	0.0317327
197	PC	11	P10_cKO3M	cKO	P10	cKO-p10	89.8708	391	3.66081	1.40549	0.643981	11.25	0.190165	0.230857
198	PC	12	P10_cKO3M	cKO	P10	cKO-p10	149.142	603	3.92914	2.37672	0.425645	8.75	0.434276	0.137957
199	PC	13	P10_cKO3M	cKO	P10	cKO-p10	169.857	467	2.56687	0.634001	0.531214	3.75	0.0126266	0.03055
1	PC	1	cKO1	cKO	P14	cKO-p14	180.03	577	3.14393	1.24626	0.61811	6.25	0.120944	0.0562336
3	PC	3	cKO1	cKO	P14	cKO-p14	226.167	1035	4.44362	0.676453	0.440646	6.25	0.0126292	0.0278555
4	PC	1	cKO2	cKO	P14	cKO-p14	75.5794	576	7.5682	0.505211	0.31381	8.75	0.00905803	0.177461
5	PC	2	cKO2	cKO	P14	cKO-p14	151.387	272	1.60516	2.88907	0.414022	3.75	0.313765	0.0955598
6	PC	1	cKO3	cKO	P14	cKO-p14	161.726	929	5.65153	0.619545	0.40192	8.75	0.0202813	0.0424251
7	PC	2	cKO3	cKO	P14	cKO-p14	518.142	3837	5.6278	1.93227	1.06364	3.75	0.354128	0.0149274
8	PC	1	cKO4	cKO	P14	cKO-p14	149.938	722	4.43518	1.43304	1.02695	3.75	0.105156	0.0377748
9	PC	2	cKO4	cKO	P14	cKO-p14	313.049	1413	4.22298	1.27975	0.974518	6.25	0.213188	0.0227679
10	PC	2	cKO5	cKO	P14	cKO-p14	99.8671	265	2.60346	1.69869	1.08566	3.75	0.264258	0.120063
11	PC	3	cKO5	cKO	P14	cKO-p14	149.916	1361	8.90497	0.510628	0.231851	11.25	0.00478347	0.0788592
77	PC	1	cKO_F_191125	cKO	P14	cKO-p14	199.068	462	2.26054	1.13972	1.08931	1.25	0.0550221	0.0374433
78	PC	2	cKO_F_191125	cKO	P14	cKO-p14	147.284	613	2.9331	1.55662	1.14136	3.75	0.275731	0.0633256
79	PC	3	cKO_F_191125	cKO	P14	cKO-p14	173.965	903	3.92608	1.24148	0.956842	3.75	0.124146	0.0644337
80	PC	4	cKO_F_191125	cKO	P14	cKO-p14	198.787	833	3.46602	1.43264	1.10854	3.75	0.257587	0.111958
81	PC	5	cKO_F_191125	cKO	P14	cKO-p14	201.396	950	4.3993	0.805638	0.80201	3.75	0.0125267	0.0796559
							Average
			Genotype	Age Group	N	n	RecordTime	SpikeNum	Freq	CV	CV2	mode	PausePercent	RhythmIndex
			ctrl	Ctrl-P07-08	13	21	207.392	540.333	3.03309	1.64863	0.405358	4.94048	0.200791	0.0859953
			ctrl	Ctrl-P09-10	12	30	156.804	1054.2	6.62343	1.44646	0.415886	8.75	0.124407	0.138596
			ctrl	Ctrl-P11-12	11	35	162.211	2763.57	14.8807	2.20191	0.309048	22.1786	0.228815	0.431486
			ctrl	Ctrl-P13-14	14	32	215.427	2861.44	13.6614	4.03482	0.275655	26.1719	0.355319	0.452661
			cKO	cKO-P10	3	15	172.748	951.533	4.77258	1.2843	0.831333	5.25	0.118227	0.0683514
			cKO	cKO-P14	6	15	196.42	983.2	4.34613	1.26447	0.777946	5.25	0.14288	0.0687162
							ANOVA Post Hoc p-values
							Group 1	Group 2	Freq	CV	CV2	mode	PausePercent	RhythmIndex
							Ctrl P7-P8	Ctrl P9-P10	0.145605	0.998802	0.999615	0.410872	0.648761	0.998342
							Ctrl P7-P8	Ctrl P11-P12	4.09687e-16	0.634032	0.665318	1.43505e-19	0.954008	1.19283e-06
							Ctrl P7-P8	Ctrl P13-P14	2.30286e-12	1.2394e-08	0.329083	0	0.00236301	3.26472e-07
							Ctrl P7-P8	cKO P10	0.935094	0.986685	5.03748e-08	1	0.730241	0.999977
							Ctrl P7-P8	cKO P14	0.982273	0.982455	3.27386e-06	1	0.939791	0.99998
							Ctrl P9-P10	Ctrl P11-P12	2.47598e-09	0.269729	0.348476	3.38997e-14	0.0815482	1.01954e-06
							Ctrl P9-P10	Ctrl P13-P14	1.53228e-06	1.33209e-11	0.11052	0	1.11029e-07	2.60738e-07
							Ctrl P9-P10	cKO P10	0.856567	0.999361	3.23295e-08	0.591134	0.999996	0.993605
							Ctrl P9-P10	cKO P14	0.715467	0.99886	2.79851e-06	0.591134	0.999082	0.993859
							Ctrl P11-P12	Ctrl P13-P14	0.929313	2.56783e-06	0.989309	0.164408	0.012863	0.999144
							Ctrl P11-P12	cKO P10	3.44243e-09	0.301129	9.73769e-14	1.09995e-14	0.202553	1.27178e-05
							Ctrl P11-P12	cKO P14	5.68669e-10	0.27756	4.95855e-11	1.09995e-14	0.484639	1.3042e-05
							Ctrl P13-P14	cKO P10	5.89762e-07	1.27524e-08	3.449e-15	1.20435e-22	2.13115e-05	4.08209e-06
							Ctrl P13-P14	cKO P14	1.27606e-07	9.61978e-09	2.52044e-12	1.20435e-22	0.000228095	4.18924e-06
							cKO P10	cKO P14	0.99992	1	0.985402	1	0.998154	1

## Sheet: Frequency distributions (F5-S1)
CellID	Type	CellNum	MouseID	Genotype	Age	AgeGroup	Peak(index)	0	2.5	5	7.5	10	12.5	15	17.5	20	22.5	25	27.5	30	32.5	35	37.5	40	42.5	45	47.5	50
32	PC	1	P7_190124	ctrl	P7	Ctrl-p07-08	1	0.198953	0.109948	0.125654	0.151832	0.151832	0.109948	0.0157068	0.026178	0.0157068	0.0209424	0.0052356	0	0	0.0104712	0.0104712	0	0.0052356	0	0.0052356	0.0052356	0.0052356
34	PC	1	P7_190212	ctrl	P7	Ctrl-p07-08	1	0.20283	0.193396	0.108491	0.0707547	0.0660377	0.0754717	0.0424528	0.0330189	0.0471698	0.0141509	0.0235849	0.00943396	0.0141509	0	0.00943396	0.00471698	0.00943396	0.00943396	0.00943396	0.0141509	0
120	PC	2	P7_200110	ctrl	P7	Ctrl-p07-08	1	0.645933	0.334928	0.0143541	0.00478469	0	0	0	0	0	0	0	0	0	0	0	0	0	0	0	0	0
121	PC	3	P7_200110	ctrl	P7	Ctrl-p07-08	1	0.841897	0.150198	0.00790514	0	0	0	0	0	0	0	0	0	0	0	0	0	0	0	0	0	0
119	PC	1	P7_200110	ctrl	P7	Ctrl-p07-08	2	0.36036	0.509009	0.0900901	0.0225225	0.0135135	0	0	0.0045045	0	0	0	0	0	0	0	0	0	0	0	0	0
126	PC	5	P7_200129	ctrl	P7	Ctrl-p07-08	2	0.00603318	0.719457	0.250377	0.0180995	0.0015083	0.0015083	0	0.0015083	0	0	0.0015083	0	0	0	0	0	0	0	0	0	0
37	PC	1	P8_190225	ctrl	P8	Ctrl-p07-08	2	0.187251	0.593625	0.143426	0.0438247	0.0199203	0.0119522	0	0	0	0	0	0	0	0	0	0	0	0	0	0	0
127	PC	4	P8_200218	ctrl	P8	Ctrl-p07-08	2	0.0127273	0.969091	0.0181818	0	0	0	0	0	0	0	0	0	0	0	0	0	0	0	0	0	0
128	PC	5	P8_200219	ctrl	P8	Ctrl-p07-08	2	0.00330033	0.981848	0.0148515	0	0	0	0	0	0	0	0	0	0	0	0	0	0	0	0	0	0
129	PC	6	P8_200220	ctrl	P8	Ctrl-p07-08	2	0.0114754	0.6	0.372131	0.00819672	0.00327869	0.00163934	0	0	0	0	0	0	0	0	0	0	0	0.00163934	0	0.00163934	0
134	PC	1	P8_200219	ctrl	P8	Ctrl-p07-08	2	0.0174825	0.622378	0.36014	0	0	0	0	0	0	0	0	0	0	0	0	0	0	0	0	0	0
135	PC	3	P8_200219-2	ctrl	P8	Ctrl-p07-08	2	0.114907	0.872671	0.00931677	0	0	0	0	0	0	0	0	0	0	0	0	0	0	0	0.00310559	0	0
140	PC	4	P8_200311-2	ctrl	P8	Ctrl-p07-08	2	0.00823529	0.603529	0.388235	0	0	0	0	0	0	0	0	0	0	0	0	0	0	0	0	0	0
141	PC	5	P8_200311-2	ctrl	P8	Ctrl-p07-08	2	0.104603	0.887029	0.0083682	0	0	0	0	0	0	0	0	0	0	0	0	0	0	0	0	0	0
50	PC	4	P7_191010	ctrl	P7	Ctrl-p07-08	3	0.101961	0.25098	0.403922	0.160784	0.027451	0.00784314	0.00392157	0.00784314	0	0	0.00392157	0.00784314	0.00392157	0	0.00392157	0	0	0	0.00392157	0.00392157	0
51	PC	5	P7_191010	ctrl	P7	Ctrl-p07-08	3	0.0471698	0.41195	0.522013	0.00628931	0	0.00314465	0	0.00314465	0	0	0.00314465	0	0	0	0	0	0	0	0	0	0
139	PC	4	P8_200311	ctrl	P8	Ctrl-p07-08	3	0.00112233	0.0460157	0.472503	0.363636	0.0549944	0.0190797	0.0123457	0.00785634	0.00448934	0.00112233	0.00561167	0.00112233	0	0.00112233	0.00112233	0.00112233	0.00224467	0	0	0	0
142	PC	6	P8_200311	ctrl	P8	Ctrl-p07-08	4	0.0039267	0.149215	0.352094	0.458115	0.0287958	0.0039267	0	0	0	0.0013089	0.0013089	0	0	0	0.0013089	0	0	0	0	0	0
38	PC	2	P8_190225	ctrl	P8	Ctrl-p07-08	5	0.00316456	0.0232068	0.0822785	0.236287	0.350211	0.189873	0.0822785	0.0221519	0.00632911	0.00316456	0	0	0	0.00105485	0	0	0	0	0	0	0
61	PC	4	P7_191018	ctrl	P7	Ctrl-p07-08	6	0.117043	0.0841889	0.10883	0.13963	0.156057	0.188912	0.123203	0.0513347	0.0164271	0.00616016	0.00616016	0.00205339	0	0	0	0	0	0	0	0	0
125	PC	9	P7_200129	ctrl	P7	Ctrl-p07-08	6	0	0	0.0219365	0.0295008	0.217095	0.419062	0.261725	0.0295008	0.00983359	0.00453858	0.00151286	0.00075643	0	0.00075643	0.00151286	0	0	0	0.00075643	0	0
49	PC	2	P10_191008	ctrl	P10	Ctrl-p09-10	2	0.00293902	0.168993	0.0396767	0.0580456	0.0786187	0.125643	0.140338	0.132256	0.0778839	0.0374724	0.0235121	0.0139603	0.0235121	0.0249816	0.0220426	0.0124908	0.00734754	0.00440852	0	0	0.00146951
70	PC	3	P10_191028	ctrl	P10	Ctrl-p09-10	2	0.0170261	0.282633	0.22361	0.150965	0.093076	0.0646992	0.0408627	0.030647	0.0113507	0.0192963	0.014756	0.014756	0.00567537	0.00113507	0.00340522	0.0102157	0.00340522	0.00113507	0.00113507	0	0
71	PC	4	P10_191028	ctrl	P10	Ctrl-p09-10	2	0.0559254	0.270306	0.158455	0.123835	0.110519	0.0838881	0.0519308	0.0399467	0.0213049	0.0213049	0.0146471	0.011984	0.00266312	0.011984	0.00133156	0.00266312	0	0.00133156	0.00266312	0	0.00133156
131	PC	6	P9_200218	ctrl	P9	Ctrl-p09-10	2	0.12	0.657143	0.222857	0	0	0	0	0	0	0	0	0	0	0	0	0	0	0	0	0	0
132	PC	5	P9_200218	ctrl	P9	Ctrl-p09-10	2	0.0197775	0.318912	0.174289	0.21508	0.176761	0.0630408	0.0284302	0	0.00247219	0	0	0	0	0	0	0	0	0	0	0	0
133	PC	3	P9_200218	ctrl	P9	Ctrl-p09-10	2	0.0127971	0.939671	0.0365631	0.00365631	0	0.00365631	0.00182815	0	0	0	0	0	0	0	0	0	0	0	0	0	0
144	PC	5	P9_200312F3	ctrl	P9	Ctrl-p09-10	2	0.0585009	0.603291	0.272395	0.0493601	0.0146252	0.00182815	0	0	0	0	0	0	0	0	0	0	0	0	0	0	0
145	PC	4	P9_200312F3	ctrl	P9	Ctrl-p09-10	2	0.238994	0.562893	0.144654	0.0283019	0.00314465	0.0157233	0	0.00628931	0	0	0	0	0	0	0	0	0	0	0	0	0
146	PC	2	P9_200312F3	ctrl	P9	Ctrl-p09-10	2	0.0696379	0.857939	0.0724234	0	0	0	0	0	0	0	0	0	0	0	0	0	0	0	0	0	0
151	PC	1	P7_191018	ctrl	P9	Ctrl-p09-10	2	0.0144695	0.660772	0.286174	0.0385852	0	0	0	0	0	0	0	0	0	0	0	0	0	0	0	0	0
86	PC	4	P10_191212	ctrl	P10	Ctrl-p09-10	3	0	0.119505	0.627747	0.175824	0.0741758	0.00274725	0	0	0	0	0	0	0	0	0	0	0	0	0	0	0
137	PC	2	P10_191101	ctrl	P10	Ctrl-p09-10	3	0.00814332	0.177524	0.210098	0.154723	0.102606	0.0798046	0.0618893	0.0537459	0.0390879	0.0309446	0.0228013	0.014658	0.00977199	0.0114007	0.00488599	0.00651466	0.00162866	0.00162866	0.00162866	0.00325733	0
72	PC	6	P9_191120	ctrl	P9	Ctrl-p09-10	3	0.00126422	0.125158	0.208597	0.20354	0.149178	0.102402	0.0556258	0.0391909	0.022756	0.022756	0.0126422	0.011378	0.00758534	0.00632111	0.00505689	0.00632111	0.00252845	0.00379267	0.00632111	0.00252845	0.00126422
130	PC	7	P9_200218	ctrl	P9	Ctrl-p09-10	3	0.0224719	0.159176	0.372659	0.26779	0.117978	0.0430712	0.0093633	0.00187266	0.00187266	0	0.00187266	0	0.00187266	0	0	0	0	0	0	0	0
122	PC	3	P10_200128	ctrl	P10	Ctrl-p09-10	4	0	0.0846154	0.369231	0.428205	0.0923077	0.0111111	0.00598291	0.0042735	0.000854701	0.0017094	0	0.000854701	0	0.000854701	0	0	0	0	0	0	0
123	PC	4	P10_200128	ctrl	P10	Ctrl-p09-10	4	0	0.0128848	0.0765927	0.576951	0.327845	0.00143164	0.00286328	0	0.00071582	0	0	0	0.00071582	0	0	0	0	0	0	0	0
118	PC	4	P9_M1_200108	ctrl	P9	Ctrl-p09-10	4	0.000674764	0.0337382	0.104588	0.205803	0.186235	0.0870445	0.0614035	0.0391363	0.0364372	0.0303644	0.0209177	0.0168691	0.00809717	0.0188934	0.0121457	0.00674764	0.00607287	0.00877193	0.00674764	0.0074224	0.00539811
76	PC	1	P10_191125	ctrl	P10	Ctrl-p09-10	5	0.00114416	0.0171625	0.0881007	0.189931	0.477117	0.176201	0.0320366	0.00915332	0.00228833	0.00114416	0.00114416	0	0.00114416	0	0	0.00114416	0	0	0	0.00114416	0
124	PC	9	P10_200128	ctrl	P10	Ctrl-p09-10	5	0	0.00745474	0.0340788	0.160809	0.607029	0.176784	0.0085197	0.00212993	0.00212993	0	0	0	0	0	0	0	0	0	0	0	0
136	PC	3	P10_200113	ctrl	P10	Ctrl-p09-10	5	0.0170455	0.0407197	0.09375	0.185606	0.36553	0.236742	0.0426136	0.00662879	0.00094697	0.00189394	0.00284091	0.00189394	0.00094697	0	0.00094697	0	0	0.00094697	0	0	0
73	PC	8	P9_191120	ctrl	P9	Ctrl-p09-10	5	0	0.0191518	0.0820793	0.113543	0.116279	0.102599	0.0896033	0.0752394	0.0615595	0.0533516	0.0403557	0.0396717	0.0287278	0.0232558	0.0143639	0.0198358	0.00752394	0.0164159	0.0102599	0.00615595	0.00889193
74	PC	9	P9_191120	ctrl	P9	Ctrl-p09-10	5	0	0.00852619	0.045676	0.0712546	0.0797808	0.0749086	0.0663825	0.0712546	0.0633374	0.0542022	0.0499391	0.0426309	0.0383678	0.0389769	0.0328867	0.0280146	0.0237515	0.0194884	0.0225335	0.0219245	0.0176614
75	PC	1	P9_191120	ctrl	P9	Ctrl-p09-10	5	0	0.0502984	0.0954817	0.282182	0.429668	0.1185	0.0161978	0.00341006	0.00170503	0	0.00170503	0	0	0.000852515	0	0	0	0	0	0	0
147	PC	7	P9_200312F4	ctrl	P9	Ctrl-p09-10	5	0.0428336	0.0362438	0.146623	0.311367	0.410214	0.0494234	0.00164745	0.00164745	0	0	0	0	0	0	0	0	0	0	0	0	0
148	PC	5	P9_200312F4	ctrl	P9	Ctrl-p09-10	5	0.0111857	0.0033557	0.0201342	0.16443	0.430649	0.326622	0.0369128	0.0033557	0.00223714	0.00111857	0	0	0	0	0	0	0	0	0	0	0
152	PC	5	P10_191212	ctrl	P10	Ctrl-p09-11	5	0.0149626	0.00872818	0.032419	0.112219	0.415212	0.331671	0.0673317	0.00997506	0.00249377	0.00374065	0	0	0	0	0	0	0	0	0	0.00124688	0
87	PC	6	P10_191212	ctrl	P10	Ctrl-p09-10	6	0.0107405	0.00452233	0.0141323	0.0276993	0.302996	0.423403	0.163369	0.0333522	0.00734878	0.00282646	0.00169587	0.00226116	0.00113058	0.000565291	0	0.000565291	0.000565291	0	0.000565291	0	0
143	PC	6	P9_200312F3	ctrl	P9	Ctrl-p09-10	6	0.0561122	0.12024	0.0681363	0.0751503	0.0661323	0.181363	0.171343	0.1002	0.0531062	0.0340681	0.0380762	0.0220441	0.00701403	0.00400802	0.00300601	0	0	0	0	0	0
149	PC	6	P9_200312F4	ctrl	P9	Ctrl-p09-10	6	0.0100376	0.0125471	0.0112923	0.107905	0.345044	0.392723	0.0702635	0.00501882	0.00878294	0.0100376	0.00376412	0.00376412	0.00250941	0.00250941	0.00250941	0.00125471	0	0.00250941	0	0	0
89	PC	1	P10_191212	ctrl	P10	Ctrl-p09-10	7	0.00269542	0.0215633	0.0231806	0.0221024	0.0253369	0.145013	0.47655	0.201078	0.0603774	0.012938	0.00215633	0.00107817	0.00107817	0.000539084	0.000539084	0.000539084	0.000539084	0.00107817	0	0.000539084	0.00107817
88	PC	3	P10_191212	ctrl	P10	Ctrl-p09-10	8	0.0180266	0.000948767	0.0170778	0.0294118	0.0521822	0.0834915	0.131879	0.169829	0.160342	0.126186	0.0920304	0.0436433	0.0218216	0.0142315	0.0113852	0.00474383	0.0056926	0.0028463	0.0028463	0.00189753	0.000948767
85	PC	8	P12_191127	ctrl	P12	Ctrl-p11-12	4	0.0167598	0.0949721	0.201117	0.441341	0.20298	0.0297952	0.00558659	0.0018622	0.00372439	0	0	0.0018622	0	0	0	0	0	0	0	0	0
31	PC	2	P11_190118	ctrl	P11	Ctrl-p11-12	5	0.0134116	0.0352054	0.0930427	0.164292	0.245599	0.202012	0.123638	0.0632858	0.0364627	0.0129925	0.00628667	0.00293378	0.000419111	0	0.000419111	0	0	0	0	0	0
53	PC	6	P11_191014	ctrl	P11	Ctrl-p11-12	5	0	0.00154242	0.0580977	0.245244	0.324422	0.206684	0.0971722	0.0488432	0.0123393	0.00257069	0.00154242	0.000514139	0	0	0	0.000514139	0.000514139	0	0	0	0
93	PC	7	P11_F_191223	ctrl	P11	Ctrl-p11-12	5	0.00855615	0.0192513	0.0459893	0.0994652	0.258824	0.233155	0.166845	0.122995	0.0385027	0.00320856	0.00106952	0	0	0	0	0	0	0	0	0	0
102	PC	5	P11_M4_200102	ctrl	P11	Ctrl-p11-12	5	0.0397351	0.0747398	0.0397351	0.140965	0.245979	0.216651	0.137181	0.0548723	0.0312204	0.0141911	0.00283822	0.000946074	0.000946074	0	0	0	0	0	0	0	0
83	PC	6	P12_191127	ctrl	P12	Ctrl-p11-12	5	0.0302613	0.0165062	0.0357634	0.219395	0.411967	0.189821	0.0460798	0.0343879	0.0130674	0.00206327	0	0	0	0	0	0	0	0	0.000687758	0	0
33	PC	1	P11_190207	ctrl	P11	Ctrl-p11-12	6	0.0184388	0.0442532	0.052858	0.106945	0.219422	0.237246	0.195452	0.090965	0.0221266	0.00614628	0.00122926	0.000614628	0.000614628	0.00122926	0	0	0.00122926	0.000614628	0	0	0
52	PC	1	P11_191014	ctrl	P11	Ctrl-p11-12	6	0	0	0.0608774	0.0644584	0.0756491	0.647717	0.145031	0.00402865	0.000447628	0	0	0.000447628	0	0	0	0.000447628	0	0.000447628	0	0	0
92	PC	4	P11_F_191223	ctrl	P11	Ctrl-p11-12	6	0	0.00787966	0.0114613	0.0229226	0.14255	0.312321	0.252865	0.151146	0.0630372	0.019341	0.00859599	0.00429799	0.000716332	0.000716332	0.000716332	0.000716332	0	0	0	0	0.000716332
99	PC	4	P11_M3_191223	ctrl	P11	Ctrl-p11-12	6	0.0350292	0.0475396	0.0508757	0.10759	0.221018	0.254379	0.125104	0.0400334	0.0341952	0.0483736	0.0225188	0.0058382	0.000834028	0.00333611	0	0	0	0	0	0	0
82	PC	4	P12_191127	ctrl	P12	Ctrl-p11-12	6	0.0255255	0.0570571	0.0720721	0.108108	0.237988	0.251502	0.168168	0.0525526	0.015015	0.00900901	0.00225225	0	0.000750751	0	0	0	0	0	0	0	0
98	PC	3	P11_M3_191223	ctrl	P11	Ctrl-p11-12	7	0.0118143	0.00168776	0.0168776	0.0253165	0.0624473	0.221941	0.291983	0.180591	0.0860759	0.043038	0.0489451	0.00675105	0.00168776	0	0	0	0.000843882	0	0	0	0
101	PC	3	P11_M4_200102	ctrl	P11	Ctrl-p11-12	7	0.00563813	0.02204	0.00615069	0.0169144	0.0548437	0.164531	0.316248	0.286007	0.097386	0.0225525	0.00615069	0.00102512	0	0	0.000512558	0	0	0	0	0	0
104	PC	3	P12_M3_200102	ctrl	P12	Ctrl-p11-12	7	0.0187562	0.00197433	0.00987167	0.0375123	0.147088	0.305035	0.339585	0.12537	0.0108588	0.0029615	0.000987167	0	0	0	0	0	0	0	0	0	0
90	PC	2	P11_F_191223	ctrl	P11	Ctrl-p11-12	8	0.00991408	0.00594845	0.010575	0.0270985	0.0343688	0.0746861	0.166557	0.248513	0.200264	0.103767	0.0522141	0.0198282	0.0085922	0.00660939	0.00396563	0.00264375	0.00264375	0.00198282	0.00198282	0.00198282	0.00132188
91	PC	3	P11_F_191223	ctrl	P11	Ctrl-p11-12	8	0.00398142	0.00331785	0.0172528	0.0272064	0.0238885	0.0126078	0.112143	0.510949	0.262774	0.0145985	0.00331785	0.00066357	0.00265428	0.00066357	0.00066357	0.00066357	0.00066357	0	0.00066357	0	0
96	PC	4	P11_F2_191223	ctrl	P11	Ctrl-p11-12	8	0.0164835	0.00915751	0.021978	0.0265568	0.0210623	0.025641	0.108974	0.349817	0.332418	0.0695971	0.00274725	0.003663	0	0.000915751	0.0018315	0	0.000915751	0.000915751	0	0	0.000915751
62	PC	1	P12_191023M	ctrl	P12	Ctrl-p11-12	8	0.00235183	0.0479774	0.0583255	0.0823142	0.0776105	0.0837253	0.104892	0.178269	0.165569	0.11571	0.0465663	0.0239887	0.0070555	0.00376294	0.000940734	0	0.000470367	0	0	0	0
63	PC	11	P12_191023M	ctrl	P12	Ctrl-p11-12	8	0.0193032	0.0263653	0.0183616	0.0216573	0.0254237	0.0423729	0.0983992	0.162429	0.137476	0.0875706	0.0536723	0.0400188	0.0291902	0.029661	0.0263653	0.0268362	0.019774	0.0211864	0.0178908	0.0141243	0.0150659
95	PC	6	P11_F2_191223	ctrl	P11	Ctrl-p11-12	9	0.0129646	0.00172861	0.00518583	0.0164218	0.0103717	0.0293863	0.0639585	0.162489	0.312878	0.299914	0.0734659	0.00691443	0.000864304	0.000864304	0	0	0	0	0	0	0
150	PC	9	P12_191023M	ctrl	P12	Ctrl-p11-12	9	0.00853485	0.0213371	0.00924609	0.0184922	0.0334282	0.0561878	0.086771	0.122333	0.146515	0.117354	0.101707	0.086771	0.0761024	0.0462304	0.0327169	0.0142248	0.00995733	0.00711238	0	0.000711238	0.000711238
55	PC	10	P11_191014	ctrl	P11	Ctrl-p11-12	10	0	0	0	0.00655093	0.0150671	0.0262037	0.0393056	0.10809	0.277104	0.29643	0.164101	0.0484769	0.0131019	0.00327547	0.000655093	0.000655093	0.000327547	0.000327547	0	0.000327547	0
97	PC	2	P11_F2_191223	ctrl	P11	Ctrl-p11-12	10	0.0106117	0.00374532	0.00811486	0.0106117	0.0118602	0.0149813	0.0168539	0.0761548	0.225343	0.38764	0.196005	0.0262172	0.00561798	0	0	0	0.00187266	0.00124844	0	0	0
65	PC	2	P12_191023M	ctrl	P12	Ctrl-p11-12	10	0.0153945	0.00256575	0.00384862	0.00962155	0.0160359	0.0173188	0.0224503	0.055805	0.141758	0.218089	0.210391	0.137909	0.0724824	0.0372033	0.0141116	0.00833868	0.00577293	0.00192431	0.00192431	0.00192431	0.000641437
84	PC	7	P12_191127	ctrl	P12	Ctrl-p11-12	10	0.000447828	0.0309001	0.0170175	0.0206001	0.025974	0.0228392	0.0291088	0.0662785	0.283923	0.289297	0.0967309	0.0425437	0.025974	0.0143305	0.00985222	0.00716525	0.0031348	0.00223914	0.00134348	0.000447828	0.000895656
94	PC	8	P11_F2_191223	ctrl	P11	Ctrl-p11-12	11	0.0145033	0.00507614	0.00362582	0.00435098	0.00507614	0.0159536	0.0137781	0.0275562	0.0833938	0.273387	0.361131	0.15736	0.0261059	0.00580131	0.00145033	0.000725163	0	0	0	0	0
100	PC	5	P11_M3_191223	ctrl	P11	Ctrl-p11-12	11	0.0131772	0.00390434	0.00732064	0.011225	0.0190337	0.0331869	0.0488043	0.080039	0.100049	0.118106	0.152269	0.143973	0.118594	0.0741825	0.0429478	0.0200098	0.00488043	0.00292826	0.000488043	0.00146413	0.000488043
64	PC	8	P12_191023M	ctrl	P12	Ctrl-p11-12	12	0.0129683	0.00504323	0.00288184	0.00648415	0.0115274	0.00432277	0.0115274	0.0136888	0.0309798	0.0511527	0.117435	0.165706	0.126081	0.115994	0.0958213	0.0590778	0.0317003	0.0252161	0.0208934	0.0180115	0.0172911
105	PC	2	P12_M3_200102	ctrl	P12	Ctrl-p11-12	14	0.0104359	0.00368324	0.000613874	0.000613874	0.00245549	0.00368324	0.00245549	0.0128913	0.0263966	0.0239411	0.0521793	0.0748926	0.131983	0.154696	0.152855	0.120319	0.0914672	0.0466544	0.0220994	0.0251688	0.0092081
66	PC	2	P12_191023M2	ctrl	P12	Ctrl-p11-12	15	0	0.011511	0.000486381	0.000324254	0.00113489	0.00129702	0.0017834	0.00372892	0.00340467	0.00616083	0.0124838	0.0377756	0.0891699	0.165532	0.202335	0.194715	0.131161	0.0640402	0.031939	0.0179961	0.00988975
30	PC	2	P11_190118	ctrl	P11	Ctrl-p11-12	16	0.00323849	0.000925283	0.000346981	0.000578302	0.000462642	0.000578302	0.00104094	0.00161925	0.00231321	0.00740227	0.0174647	0.0319223	0.0593338	0.0891742	0.12526	0.163891	0.15857	0.136017	0.0863983	0.0523942	0.025214
54	PC	8	P11_191014	ctrl	P11	Ctrl-p11-12	17	0	0.000562825	0.00309554	0.00365836	0.00309554	0.00422119	0.00633179	0.00830167	0.00914591	0.00647249	0.00900521	0.0166033	0.0343323	0.0716195	0.118053	0.155903	0.172506	0.160546	0.0996201	0.0616294	0.0256086
67	PC	3	P12_191023M2	ctrl	P12	Ctrl-p11-12	18	0.000762777	0.0116959	0.000508518	0.000762777	0.000508518	0.00127129	0.00177981	0.00177981	0.00177981	0.00203407	0.00254259	0.00483092	0.00559369	0.0155098	0.0297483	0.070684	0.12001	0.166031	0.161709	0.155098	0.0907704
68	PC	5	P12_191023M2	ctrl	P12	Ctrl-p11-12	18	0	0.00892704	0.0130472	0.00978541	0.0101288	0.0109871	0.0147639	0.016309	0.023176	0.0322747	0.0319313	0.0334764	0.0429185	0.0470386	0.0638627	0.072618	0.0870386	0.109013	0.0906438	0.0688412	0.0441202
69	PC	7	P12_191023M2	ctrl	P12	Ctrl-p11-12	18	0	0.00167392	0.017074	0.0138935	0.0138935	0.0185805	0.0194175	0.0192501	0.0154001	0.0160696	0.0205892	0.0199197	0.0172414	0.0199197	0.041848	0.066622	0.12772	0.17074	0.153164	0.105792	0.0585872
28	PC	2	ctrl7	ctrl	P14	Ctrl-p13-14	5	0.0203857	0.0121212	0.0738292	0.21708	0.347107	0.229201	0.0661157	0.0209366	0.00936639	0.00165289	0.00165289	0.000550964	0	0	0	0	0	0	0	0	0
106	PC	1	P13_F4_200104	ctrl	P13	Ctrl-p13-14	6	0.0021645	0.0238095	0.0395022	0.0957792	0.318723	0.369048	0.125	0.0178571	0.00487013	0.00162338	0.000541126	0	0	0.000541126	0.000541126	0	0	0	0	0	0
16	PC	1	ctrl3	ctrl	P14	Ctrl-p13-14	6	0.00942588	0.00128535	0.0128535	0.0865467	0.25407	0.357755	0.197943	0.0535561	0.0115681	0.00814053	0.00257069	0.0017138	0.000856898	0.000856898	0.000428449	0	0	0.000428449	0	0	0
13	PC	1	ctrl2	ctrl	P14	Ctrl-p13-14	7	0.00253807	0.0375635	0.0436548	0.064467	0.135025	0.279695	0.305076	0.115736	0.0126904	0.00203046	0	0.00101523	0	0	0	0	0	0	0	0	0
18	PC	1	ctrl4	ctrl	P14	Ctrl-p13-14	7	0.00828475	0.0248542	0.0227064	0.0497085	0.099417	0.180117	0.216938	0.195766	0.102485	0.0466401	0.021479	0.00920528	0.00460264	0.00306843	0.00368211	0.00276158	0.000920528	0.00122737	0.00122737	0.00122737	0.000613685
57	PC	4	P13F_19101	ctrl	P13	Ctrl-p13-14	8	0.0109375	0.00104167	0.003125	0.00520833	0.0151042	0.0473958	0.15	0.323958	0.306771	0.11875	0.0151042	0.000520833	0	0	0	0	0.000520833	0.000520833	0	0	0
116	PC	3	P13_F2_200104	ctrl	P13	Ctrl-p13-14	8	0.0303556	0.0208153	0.0407632	0.0763226	0.105811	0.0971379	0.128361	0.13183	0.130963	0.0980052	0.0520382	0.0147441	0.00607112	0.00433651	0.00520382	0.00260191	0.00346921	0.00173461	0.00346921	0.00173461	0.00520382
56	PC	1	P13F_19101	ctrl	P13	Ctrl-p13-14	9	0.0182605	0.00240269	0.0163383	0.0192215	0.0269101	0.0408457	0.103316	0.280154	0.299375	0.165305	0.0225853	0.00240269	0.00192215	0	0	0	0	0	0	0	0
108	PC	7	P13_F4_200105	ctrl	P13	Ctrl-p13-14	9	0.00118064	0.012987	0.014758	0.0312869	0.0513577	0.0737898	0.125148	0.144628	0.150531	0.109799	0.0897285	0.0572609	0.0430933	0.0301063	0.0194805	0.012987	0.00649351	0.00354191	0.00590319	0.00236128	0.000590319
19	PC	2	ctrl4	ctrl	P14	Ctrl-p13-14	9	0.00612197	0	0.000470921	0.00141276	0.00376737	0.0101248	0.0515658	0.172121	0.31222	0.291735	0.124794	0.023546	0.00211914	0	0	0	0	0	0	0	0
21	PC	1	ctrl5	ctrl	P14	Ctrl-p13-14	9	0.024373	0.00247262	0.00317909	0.0102437	0.0130696	0.0233133	0.0681738	0.235253	0.385023	0.190392	0.033557	0.00565171	0.00282586	0.000353232	0	0.000706464	0	0.000353232	0	0	0
22	PC	2	ctrl5	ctrl	P14	Ctrl-p13-14	9	0.00715092	0.000376364	0	0.00150546	0.00564546	0.0308619	0.0828002	0.207	0.327813	0.238615	0.0816711	0.0135491	0.00301091	0	0	0	0	0	0	0	0
111	PC	2	P13_F3_200104	ctrl	P13	Ctrl-p13-14	10	0.010245	0.00489978	0.00801782	0.0187082	0.0267261	0.0449889	0.0636971	0.0908686	0.150557	0.17951	0.131849	0.0868597	0.0877506	0.0503341	0.0285078	0.00846325	0.00222717	0.000890869	0	0.000445434	0.000445434
109	PC	8	P13_F4_200106	ctrl	P13	Ctrl-p13-14	11	0.0037843	0.00283822	0.00331126	0.00662252	0.0089877	0.0170293	0.0184484	0.0312204	0.0685904	0.131504	0.194891	0.155629	0.118259	0.0842006	0.0458846	0.0236518	0.0170293	0.0170293	0.00946074	0.00709555	0.00236518
15	PC	6	ctrl2	ctrl	P14	Ctrl-p13-14	11	0.00437389	0.00145796	0.000323992	0.00145796	0.00178195	0.0037259	0.00874777	0.0234894	0.0714401	0.178195	0.283007	0.24672	0.121011	0.0424429	0.00809979	0.00210595	0.000809979	0.000161996	0.000161996	0.000161996	0.000161996
17	PC	3	ctrl3	ctrl	P14	Ctrl-p13-14	11	0.00559832	0.0121297	0.0025659	0.004432	0.00349895	0.0069979	0.00933053	0.0340564	0.138092	0.294612	0.299277	0.135993	0.034523	0.00933053	0.00209937	0.00069979	0.00069979	0.000933053	0.000466527	0.000466527	0.000233263
23	PC	4	ctrl5	ctrl	P14	Ctrl-p13-14	11	0.00931809	0.000423549	0.000423549	0.000423549	0.0025413	0.00847099	0.0190597	0.0529437	0.108429	0.155866	0.232952	0.190597	0.119441	0.0550614	0.0266836	0.0105887	0.0025413	0.0025413	0	0	0.00127065
25	PC	3	ctrl6	ctrl	P14	Ctrl-p13-14	11	0.00689155	0.000362713	0.000725426	0.00362713	0.00435256	0.0188611	0.0344577	0.0642002	0.11498	0.172289	0.184984	0.18317	0.103373	0.054407	0.0272035	0.0134204	0.0054407	0.00362713	0.00108814	0.000725426	0.00108814
27	PC	1	ctrl7	ctrl	P14	Ctrl-p13-14	11	0.0108225	0.000927644	0.00154607	0.00185529	0.0021645	0.00525665	0.0105133	0.0293754	0.0890538	0.160482	0.209029	0.209029	0.147495	0.0739023	0.0269017	0.00680272	0.00742115	0.00340136	0.00123686	0.000309215	0.00123686
59	PC	6	P13F_19101	ctrl	P13	Ctrl-p13-14	12	0.0115125	0.00119095	0.00158793	0.00357285	0.00873362	0.0146884	0.0154823	0.0254069	0.0381104	0.0583565	0.093688	0.13418	0.13418	0.121477	0.0905121	0.0623263	0.0504168	0.0361254	0.0317586	0.0202461	0.0134974
114	PC	1	P13_F2_200104	ctrl	P13	Ctrl-p13-14	12	0.00300601	0.0404142	0.00400802	0.00935204	0.0150301	0.0240481	0.0374081	0.0480962	0.0647963	0.0768203	0.0845023	0.0898464	0.0868403	0.0774883	0.0637943	0.0544422	0.0467602	0.0334001	0.0263861	0.0220441	0.012024
115	PC	2	P13_F2_200104	ctrl	P13	Ctrl-p13-14	13	0.00468567	0.014057	0.00195236	0.00390472	0.00898087	0.0105428	0.0203046	0.0265521	0.056228	0.0976181	0.130418	0.153065	0.160875	0.131589	0.0737993	0.0417806	0.0238188	0.0144475	0.00741898	0.00390472	0.00273331
117	PC	4	P13_F2_200104	ctrl	P13	Ctrl-p13-14	13	0.0174292	0.0408497	0.0125272	0.0141612	0.0196078	0.0190632	0.0190632	0.0392157	0.0462963	0.0680828	0.08878	0.122549	0.136166	0.133442	0.0757081	0.046841	0.0277778	0.0174292	0.0136166	0.0103486	0.00980392
14	PC	5	ctrl2	ctrl	P14	Ctrl-p13-14	13	0.00932529	0.00356555	0.00082282	0.00164564	0.00493692	0.0041141	0.00438837	0.0112452	0.0200219	0.0449808	0.101755	0.160724	0.206528	0.193637	0.125069	0.0641799	0.0287987	0.00932529	0.00383982	0	0.000548546
60	PC	8	P13F_19101	ctrl	P13	Ctrl-p13-14	14	0.0116186	0.00240385	0	0.00320513	0.0068109	0.00921474	0.0172276	0.0252404	0.036859	0.0536859	0.0873397	0.127003	0.17508	0.18149	0.136619	0.083734	0.0276442	0.00721154	0.00400641	0.00160256	0.000400641
107	PC	6	P13_F4_200104	ctrl	P13	Ctrl-p13-14	14	0.0110497	0.00184162	0.00306937	0.0122775	0.00491099	0.00122775	0.00245549	0.00122775	0.00552486	0.00798036	0.0135052	0.0356047	0.116636	0.183548	0.164518	0.128913	0.107428	0.0755064	0.0503376	0.0306937	0.0110497
110	PC	1	P13_F3_200104	ctrl	P13	Ctrl-p13-14	14	0.0082231	0	0.000715052	0.00107258	0.00250268	0.00286021	0.00786557	0.0096532	0.0107258	0.0185913	0.0479085	0.127637	0.233464	0.266714	0.161959	0.0539864	0.0171612	0.0100107	0.0014301	0.00214516	0.0014301
113	PC	6	P13_F3_200106	ctrl	P13	Ctrl-p13-14	14	0.0110497	0.00184162	0.00306937	0.0122775	0.00491099	0.00122775	0.00245549	0.00122775	0.00552486	0.00798036	0.0135052	0.0356047	0.116636	0.183548	0.164518	0.128913	0.107428	0.0755064	0.0503376	0.0306937	0.0110497
20	PC	3	ctrl4	ctrl	P14	Ctrl-p13-14	14	0.00344511	0.000229674	0.000459348	0.00160772	0.00321543	0.00689022	0.0135508	0.0241158	0.0447864	0.0617823	0.0792375	0.11989	0.169729	0.195452	0.164676	0.0790078	0.0248048	0.00459348	0.00137804	0.000689022	0.000459348
112	PC	3	P13_F3_200105	ctrl	P13	Ctrl-p13-14	15	0.010198	0.00119976	0.00059988	0.00119976	0.0029994	0.00239952	0.00959808	0.0161968	0.0191962	0.0275945	0.0377924	0.0845831	0.131974	0.131974	0.181764	0.170366	0.104379	0.0359928	0.00779844	0.0029994	0.00179964
24	PC	5	ctrl5	ctrl	P14	Ctrl-p13-14	17	0.011813	0.00154083	0	0	0.00154083	0.00308166	0.00359527	0.00205444	0.00359527	0.00616333	0.0115562	0.0169492	0.0328711	0.0480226	0.0688238	0.087057	0.0932203	0.0880842	0.0747304	0.0724191	0.0616333
26	PC	4	ctrl6	ctrl	P14	Ctrl-p13-14	18	0.00458392	0	0	0.00176305	0.00141044	0.00211566	0.00352609	0.00423131	0.00916784	0.0155148	0.0278561	0.0419605	0.0655853	0.0789845	0.098378	0.105078	0.102962	0.110367	0.0860367	0.0624118	0.0433709
194	PC	9	P10_cKO3M	cKO	P10	cKO-p10	1	0.343195	0.035503	0.0236686	0.248521	0.266272	0.0710059	0.00591716	0	0	0.00591716	0	0	0	0	0	0	0	0	0	0	0
186	PC	1	P10_cKO1M	cKO	P10	cKO-p10	2	0.00310078	0.232558	0.16124	0.0666667	0.0635659	0.0496124	0.0465116	0.0527132	0.0263566	0.0403101	0.0263566	0.0170543	0.027907	0.0108527	0.00775194	0.0139535	0.0139535	0.0170543	0.0108527	0.00775194	0.00775194
188	PC	6	P10_cKO1M	cKO	P10	cKO-p10	2	0.0334008	0.192308	0.178138	0.0890688	0.0536437	0.0384615	0.0384615	0.0506073	0.034413	0.0182186	0.0222672	0.0182186	0.00809717	0.01417	0.0131579	0.0121457	0.0101215	0.00404858	0.00910931	0.00809717	0.00809717
189	PC	5	P10_cKO2F	cKO	P10	cKO-p10	2	0.0574827	0.342914	0.262636	0.061447	0.0297324	0.0386521	0.0208127	0.0297324	0.0257681	0.0208127	0.0148662	0.0049554	0.0138751	0.0178394	0.00396432	0.00594648	0.00693756	0.00891972	0.00396432	0.00396432	0.00297324
191	PC	7	P10_cKO2F	cKO	P10	cKO-p10	2	0.0767327	0.329208	0.108911	0.0940594	0.0668317	0.0594059	0.0445545	0.0321782	0.0222772	0.019802	0.0173267	0.00742574	0.019802	0.0123762	0.0123762	0.0123762	0.0049505	0.00990099	0.00742574	0.0049505	0.0123762
192	PC	8	P10_cKO2F	cKO	P10	cKO-p10	2	0.125	0.362288	0.169492	0.0466102	0.0402542	0.0275424	0.0190678	0.0233051	0.0105932	0.0190678	0.00635593	0.0105932	0.0148305	0.0105932	0.0148305	0.0211864	0.0190678	0.0127119	0.0148305	0.00847458	0.0127119
193	PC	3	P10_cKO3M	cKO	P10	cKO-p10	2	0.0619469	0.306785	0.277286	0.171091	0.0707965	0.0412979	0.0324484	0.0117994	0.00589971	0.00294985	0.00294985	0.00589971	0	0.00294985	0	0	0	0	0	0	0
196	PC	10	P10_cKO3M	cKO	P10	cKO-p10	2	0.0429688	0.320312	0.240234	0.123047	0.09375	0.0761719	0.0644531	0.03125	0.00585938	0.00195312	0	0	0	0	0	0	0	0	0	0	0
199	PC	13	P10_cKO3M	cKO	P10	cKO-p10	2	0.0627907	0.648837	0.2	0.0488372	0.0209302	0.0116279	0.00232558	0.00232558	0	0	0	0	0	0	0	0	0	0	0	0	0
185	PC	8	P10_cKO1M	cKO	P10	cKO-p10	3	0.0052356	0.0766642	0.18362	0.10359	0.0579656	0.0329095	0.0336574	0.0287958	0.0231862	0.0250561	0.0280479	0.0183246	0.0190726	0.0175767	0.0142109	0.0175767	0.0145849	0.0179506	0.0190726	0.0194465	0.0157068
187	PC	4	P10_cKO1M	cKO	P10	cKO-p10	3	0.0140449	0.115169	0.264045	0.102528	0.0646067	0.0491573	0.0294944	0.0337079	0.0238764	0.0308989	0.0224719	0.0266854	0.0154494	0.0196629	0.0224719	0.0196629	0.0182584	0.00983146	0.00842697	0.00702247	0.00702247
190	PC	6	P10_cKO2F	cKO	P10	cKO-p10	3	0.0186404	0.157895	0.208333	0.089364	0.0542763	0.0570175	0.0427632	0.0411184	0.0274123	0.029057	0.0213816	0.0307018	0.0142544	0.0158991	0.0137061	0.0164474	0.0109649	0.0120614	0.00877193	0.0126096	0.00767544
195	PC	6	P10_cKO3M	cKO	P10	cKO-p10	4	0.0145929	0.0184332	0.163594	0.443164	0.281106	0.0706605	0.00691244	0.000768049	0	0	0	0	0	0	0	0	0	0	0	0.000768049	0
198	PC	12	P10_cKO3M	cKO	P10	cKO-p10	4	0.0492958	0.0387324	0.190141	0.429577	0.246479	0.0422535	0.00352113	0	0	0	0	0	0	0	0	0	0	0	0	0	0
197	PC	11	P10_cKO3M	cKO	P10	cKO-p10	5	0.11859	0.0929487	0.160256	0.205128	0.221154	0.112179	0.0641026	0.0160256	0.00641026	0.00320513	0	0	0	0	0	0	0	0	0	0	0
77	PC	1	cKO_F_191125	cKO	P14	cKO-p14	1	0.234339	0.171694	0.0858469	0.148492	0.150812	0.0951276	0.0788863	0.025522	0.00232019	0.00464037	0	0	0	0.00232019	0	0	0	0	0	0	0
5	PC	2	cKO2	cKO	P14	cKO-p14	2	0.0909091	0.658009	0.155844	0.0519481	0.021645	0.004329	0.012987	0.004329	0	0	0	0	0	0	0	0	0	0	0	0	0
7	PC	2	cKO3	cKO	P14	cKO-p14	2	0.0657835	0.148926	0.111466	0.116035	0.0571037	0.0443125	0.0370032	0.0351759	0.0296939	0.0301508	0.0292371	0.0196437	0.0210142	0.0132481	0.0123344	0.0114207	0.0114207	0.0118776	0.0100503	0.0105071	0.0077661
8	PC	1	cKO4	cKO	P14	cKO-p14	2	0.0921053	0.298246	0.20614	0.0548246	0.0328947	0.0350877	0.0197368	0.0219298	0.0394737	0.0285088	0.0285088	0.0241228	0.0241228	0.00657895	0.0153509	0.0131579	0	0.00219298	0	0.00657895	0.00219298
10	PC	2	cKO5	cKO	P14	cKO-p14	2	0.102128	0.391489	0.229787	0	0.012766	0.012766	0.0170213	0.0468085	0.0170213	0.0255319	0.00851064	0.0170213	0.0212766	0.0212766	0.0212766	0.0170213	0.0170213	0.00425532	0	0.00425532	0
78	PC	2	cKO_F_191125	cKO	P14	cKO-p14	2	0.172324	0.177546	0.0992167	0.0626632	0.0496084	0.0365535	0.0548303	0.0339426	0.0287206	0.0313316	0.0391645	0.0208877	0.0182768	0.0078329	0.0182768	0.0182768	0.0182768	0.0182768	0.0130548	0.0078329	0.0078329
79	PC	3	cKO_F_191125	cKO	P14	cKO-p14	2	0.114338	0.235935	0.219601	0.107078	0.061706	0.0490018	0.0199637	0.0272232	0.0108893	0.00907441	0.00181488	0.00362976	0.00362976	0.00362976	0.00362976	0.00181488	0.00362976	0.00181488	0.00181488	0.00362976	0.00181488
80	PC	4	cKO_F_191125	cKO	P14	cKO-p14	2	0.164122	0.167939	0.116412	0.0954198	0.0648855	0.0591603	0.0438931	0.0572519	0.0648855	0.0343511	0.0133588	0.00954198	0.0019084	0.0019084	0.00381679	0.00572519	0.0019084	0.00381679	0.0019084	0	0.00381679
81	PC	5	cKO_F_191125	cKO	P14	cKO-p14	2	0.0201765	0.332913	0.240858	0.137453	0.0870113	0.0466583	0.0252207	0.0201765	0.0113493	0.00252207	0.0037831	0.0075662	0.00126103	0.00252207	0.00630517	0.0037831	0.00630517	0.00126103	0.0037831	0.00126103	0.00252207
1	PC	1	cKO1	cKO	P14	cKO-p14	3	0.0715564	0.246869	0.275492	0.268336	0.105546	0.0214669	0	0.00178891	0	0	0.00178891	0	0.00178891	0	0.00178891	0	0	0	0.00178891	0	0
3	PC	3	cKO1	cKO	P14	cKO-p14	3	0.0111111	0.224242	0.386869	0.240404	0.109091	0.0141414	0.00808081	0.0030303	0.0010101	0	0.0010101	0	0	0	0	0	0	0	0	0	0
9	PC	2	cKO4	cKO	P14	cKO-p14	3	0.0760967	0.225604	0.239928	0.0778872	0.0599821	0.042077	0.0358102	0.0295434	0.0241719	0.0393912	0.0170098	0.0134288	0.0152193	0.0125336	0.0152193	0.0080573	0.00716204	0.00716204	0.00984781	0.00358102	0.00447628
4	PC	1	cKO2	cKO	P14	cKO-p14	4	0	0.0409982	0.163993	0.379679	0.224599	0.130125	0.030303	0.00534759	0.00178253	0.00534759	0	0.00178253	0.00356506	0	0	0.00178253	0.00178253	0	0	0.00356506	0
6	PC	1	cKO3	cKO	P14	cKO-p14	4	0.00558036	0.121652	0.280134	0.427455	0.133929	0.0122768	0.00892857	0.00111607	0.00223214	0	0	0.00111607	0.00111607	0	0.00111607	0	0.00111607	0	0	0	0
11	PC	3	cKO5	cKO	P14	cKO-p14	5	0	0.0261941	0.0885978	0.256549	0.289676	0.176425	0.124807	0.027735	0.00231125	0.00308166	0	0.00154083	0.000770416	0.000770416	0	0	0	0	0.000770416	0	0

## Sheet: ePhys SS data P18 (F6-S1)
CellID	Type	CellNum	MouseID	Genotype	Age	Age Group	RecordTime	SpikeNum	Freq	CV	CV2	mode	PausePercent	RhythmIndex
153	PC	1	P18_Ctrl1F	ctrl	P18	Ctrl-P18	201.153	1781	8.57556	1.88578	0.587708	13.75	0.336391	0.0504591
154	PC	2	P18_Ctrl1F	ctrl	P18	Ctrl-P18	199.96	2576	12.8826	7.7708	0.337984	26.25	0.535328	0.164256
155	PC	4	P18_Ctrl1F	ctrl	P18	Ctrl-P18	299.902	3329	11.0836	7.41167	0.233598	18.75	0.340025	0.166833
156	PC	5	P18_Ctrl1F	ctrl	P18	Ctrl-P18	400.617	4712	9.84482	5.60598	0.262937	16.25	0.313085	0.215121
157	PC	1	P18_Ctrl2F	ctrl	P18	Ctrl-P18	209.492	3107	14.8072	4.6588	0.447076	23.75	0.33691	0.101269
158	PC	2	P18_Ctrl2F	ctrl	P18	Ctrl-P18	204.322	1715	8.37405	6.58858	0.219016	18.75	0.485152	0.400254
159	PC	3	P18_Ctrl2F	ctrl	P18	Ctrl-P18	206.207	3507	16.915	7.88762	0.240943	28.75	0.349124	0.333721
160	PC	5	P18_Ctrl2F	ctrl	P18	Ctrl-P18	206.964	5062	24.2844	2.80792	0.455346	48.75	0.371589	0.241692
161	PC	6	P18_Ctrl2F	ctrl	P18	Ctrl-P18	207.539	5127	22.8198	6.58408	0.132882	38.75	0.374743	1.35283
162	PC	1	P18_Ctrl3M	ctrl	P18	Ctrl-P18	274.22	4005	14.5832	3.88006	0.323838	26.25	0.345513	0.359279
163	PC	2	P18_Ctrl3M	ctrl	P18	Ctrl-P18	199.881	5219	26.1055	3.82114	0.20729	31.25	0.0979529	0.593773
164	PC	3	P18_Ctrl3M	ctrl	P18	Ctrl-P18	285.59	6131	21.3593	7.69682	0.135858	38.75	0.402088	1.10285
165	PC	4	P18_Ctrl3M	ctrl	P18	Ctrl-P18	201.491	3032	14.9188	3.26632	0.485859	23.75	0.318332	0.16877
166	PC	6	P18_Ctrl3M	ctrl	P18	Ctrl-P18	400.305	3581	8.94319	4.69255	0.362163	21.25	0.519811	0.246563
167	PC	1	P18_Ctrl4M	ctrl	P18	Ctrl-P18	149.969	3141	19.7041	1.35253	0.337524	23.75	0.149708	0.0944691
168	PC	3	P18_Ctrl4M	ctrl	P18	Ctrl-P18	299.295	7751	24.7014	3.64482	0.225306	33.75	0.219176	0.834982
169	PC	4	P18_Ctrl4M	ctrl	P18	Ctrl-P18	165.404	4422	26.668	5.35526	0.375531	38.75	0.338503	0.13063
170	PC	1	P18_cKO1M	cKO	P18	cKO-P18	198.505	721	2.8765	1.82664	1.02784	3.75	0.392597	0.129796
171	PC	2	P18_cKO1M	cKO	P18	cKO-P18	200.272	1129	4.7785	1.8329	1.06646	3.75	0.375435	0.162724
172	PC	3	P18_cKO1M	cKO	P18	cKO-P18	199.834	892	4.01333	2.38424	1.19599	1.25	0.581017	0.0248822
173	PC	4	P18_cKO1M	cKO	P18	cKO-P18	304.15	3065	9.05145	2.62489	0.858469	3.75	0.424359	0.0486398
174	PC	5	P18_cKO1M	cKO	P18	cKO-P18	216.169	293	1.29066	1.46726	1.06798	1.25	0.214947	0
175	PC	7	P18_cKO2F	cKO	P18	cKO-P18	249.701	791	3.05165	0.970113	0.80666	3.75	0.0612716	0.065998
176	PC	6	P18_cKO2F	cKO	P18	cKO-P18	307.34	4839	15.2014	0.503268	0.354365	16.25	0	0.13846
177	PC	5	P18_cKO2F	cKO	P18	cKO-P18	193.061	471	2.19619	1.32226	1.09352	3.75	0.124248	0.0644667
178	PC	2	P18_cKO2F	cKO	P18	cKO-P18	168.851	660	3.67187	1.22613	0.968916	3.75	0.105366	0
179	PC	1	P18_cKO2F	cKO	P18	cKO-P18	206.124	602	2.62948	1.42061	1.22954	3.75	0.131943	0.0492387
180	PC	1	P18_cKO3F	cKO	P18	cKO-P18	212.635	1682	7.3412	2.25086	1.00294	8.75	0.488617	0.0684014
181	PC	2	P18_cKO3F	cKO	P18	cKO-P18	140.552	849	5.82704	2.01304	1.14858	3.75	0.442544	0.0274861
182	PC	4	P18_cKO3F	cKO	P18	cKO-P18	199.696	1320	6.4448	2.17619	1.14314	3.75	0.484778	0.0400568
183	PC	7	P18_cKO3F	cKO	P18	cKO-P18	189.35	1102	5.69843	1.9905	1.16497	3.75	0.442886	0.0522308
184	PC	5	P18_cKO3F	cKO	P18	cKO-P18	207.39	1729	7.6619	2.28591	1.14918	3.75	0.509091	0.0554187
							Average
			Genotype	Age Group	N	n	RecordTime	SpikeNum	Freq	CV	CV2	mode	PausePercent	RhythmIndex
			ctrl	Ctrl-P18	4	17	241.901	4011.65	16.8571	4.99475	0.315933	27.7206	0.343143	0.38575
			cKO	cKO-P18	3	15	212.909	1343	5.44896	1.75299	1.01857	4.58333	0.318607	0.0618533
							p-value t-test
							0.195593	7.41128e-06	1.19598e-06	2.51927e-06	2.60356e-12	6.67978e-10	0.657374	0.00242361
