# Supplementary material for: Maturation of Purkinje cell firing properties relies on neurogenesis of excitatory neurons
Source: eLife. 2021 Sep 20;10:e68045. doi: 10.7554/eLife.68045 (PMC8452305; doi:10.7554/eLife.68045)
Supplement: Figure 7—source data 1. [file elife-68045-fig7-data1.xlsx]

## Sheet: Vglut2 - Area
FileName	MouseID	Genotype	Age	%Area		Age	Genotype	MouseID	Area	Group Average
P14_Vglut2_cKO1-1_c1+2	cKO1	cKO	P14	8.734		P7	Control	Ctrl1	5.2254
P14_Vglut2_cKO1-2_c1+2	cKO1	cKO	P14	6.364		P7	Control	Ctrl2	6.3262
P14_Vglut2_cKO1-3_c1+2	cKO1	cKO	P14	7.857		P7	Control	Ctrl3	5.30425	5.61862
P14_Vglut2_cKO1-4_c1+2	cKO1	cKO	P14	6.684		P7	cKO	cKO1	7.407
P14_Vglut2_cKO1-5_c1+3	cKO1	cKO	P14	6.232		P7	cKO	cKO2	8.3845		Fold-Change
P14_Vglut2_cKO2-1_c1+1	cKO2	cKO	P14	7.634		P7	cKO	cKO3	7.23225	7.67458	1.36592
P14_Vglut2_cKO2-2_c1+2	cKO2	cKO	P14	9.931		P14	Control	Ctrl1	2.9812
P14_Vglut2_cKO2-3_c1+2	cKO2	cKO	P14	6.519		P14	Control	Ctrl2	3.25925
P14_Vglut2_cKO2-4_c1+2	cKO2	cKO	P14	6.219		P14	Control	Ctrl3	3.4022	3.21422
P14_Vglut2_cKO2-5_c1+3	cKO2	cKO	P14	7.398		P14	cKO	cKO1	7.1742
P14_Vglut2_cKO3-1_c1+1	cKO3	cKO	P14	11.194		P14	cKO	cKO2	7.5402		Fold-Change
P14_Vglut2_cKO3-2_c1+2	cKO3	cKO	P14	8.358		P14	cKO	cKO3	9.0174	7.9106	2.46113
P14_Vglut2_cKO3-3_c1+2	cKO3	cKO	P14	9.711
P14_Vglut2_cKO3-4_c1+2	cKO3	cKO	P14	6.609
P14_Vglut2_cKO3-5_c1+3	cKO3	cKO	P14	9.215
P14_Vglut2_Ctrl1-1_c1+2	Ctrl1	Ctrl	P14	3.194
P14_Vglut2_Ctrl1-2_c1+2	Ctrl1	Ctrl	P14	2.915
P14_Vglut2_Ctrl1-3_c1+3	Ctrl1	Ctrl	P14	2.666
P14_Vglut2_Ctrl1-4_c1+4	Ctrl1	Ctrl	P14	3.708
P14_Vglut2_Ctrl1-5_c1+5	Ctrl1	Ctrl	P14	2.423
P14_Vglut2_Ctrl2-1_c1+1	Ctrl2	Ctrl	P14	2.31
P14_Vglut2_Ctrl2-2_c1+2	Ctrl2	Ctrl	P14	3.043
P14_Vglut2_Ctrl2-3_c1+3	Ctrl2	Ctrl	P14	4.592
P14_Vglut2_Ctrl2-5_c1+5	Ctrl2	Ctrl	P14	3.092
P14_Vglut2_Ctrl3-1_c1+1	Ctrl3	Ctrl	P14	4.453
P14_Vglut2_Ctrl3-2_c1+2	Ctrl3	Ctrl	P14	2.827
P14_Vglut2_Ctrl3-3_c1+3	Ctrl3	Ctrl	P14	1.907
P14_Vglut2_Ctrl3-4_c1+4	Ctrl3	Ctrl	P14	3.973
P14_Vglut2_Ctrl3-5_c1+5	Ctrl3	Ctrl	P14	3.851
P7_Vglut2_cKO1-1_c1+2_c1+2	cKO1	cKO	P7	9.76
P7_Vglut2_cKO1-2_c1+2_c1+2	cKO1	cKO	P7	4.814
P7_Vglut2_cKO1-4_c1+2-2	cKO1	cKO	P7	6.885
P7_Vglut2_cKO1-5_c1+2-2	cKO1	cKO	P7	5.002
P7_Vglut2_cKO1-5_c1+2_c1+2	cKO1	cKO	P7	10.574
P7_Vglut2_cKO2-1_c1+2	cKO2	cKO	P7	8.044
P7_Vglut2_cKO2-1_c1+2_c1=2	cKO2	cKO	P7	9.988
P7_Vglut2_cKO2-2_c1+2_c1+2	cKO2	cKO	P7	7.195
P7_Vglut2_cKO2-3_c1+2	cKO2	cKO	P7	8.311
P7_Vglut2_cKO3-2_c1+2	cKO3	cKO	P7	5.2
P7_Vglut2_cKO3-3_c1+3	cKO3	cKO	P7	5.825
P7_Vglut2_cKO3-4_c1+4	cKO3	cKO	P7	9.001
P7_Vglut2_cKO3-5_c1+5	cKO3	cKO	P7	8.903
P7_Vglut2_Ctrl-1-1_c1+2	Ctrl1	Ctrl	P7	2.935
P7_Vglut2_Ctrl-1-2_c1+2	Ctrl1	Ctrl	P7	7.192
P7_Vglut2_Ctrl-1-3_c1+2	Ctrl1	Ctrl	P7	4.83
P7_Vglut2_Ctrl-1-4_c1+2	Ctrl1	Ctrl	P7	6.992
P7_Vglut2_Ctrl-1-5_c1+2	Ctrl1	Ctrl	P7	4.178
P7_Vglut2_Ctrl-2-1_c1+1	Ctrl2	Ctrl	P7	5.671
P7_Vglut2_Ctrl-2-2_c1+2	Ctrl2	Ctrl	P7	5.841
P7_Vglut2_Ctrl-2-3_c1+2	Ctrl2	Ctrl	P7	6.889
P7_Vglut2_Ctrl-2-4_c1+2	Ctrl2	Ctrl	P7	9.42
P7_Vglut2_Ctrl-2-5_c1+2	Ctrl2	Ctrl	P7	3.81
P7_Vglut2_Ctrl-3-1_c1+1	Ctrl3	Ctrl	P7	8.039
P7_Vglut2_Ctrl-3-2_c1+2	Ctrl3	Ctrl	P7	6.879
P7_Vglut2_Ctrl-3-4_c1+2	Ctrl3	Ctrl	P7	2.791
P7_Vglut2_Ctrl-3-5_c1+2	Ctrl3	Ctrl	P7	3.508

## Sheet: Vglut2 - direct contacts
FileName	MouseID	Genotype	Age	% cells w/ direct synapses		Age	Genotype	MouseID	Area	Group Average
P7_Vglut2_cKO1-1_c1+2_c1+2	cKO1	cKO	P7	1		P7	Control	Ctrl1	0.768856
P7_Vglut2_cKO1-2_c1+2_c1+2	cKO1	cKO	P7	1		P7	Control	Ctrl2	0.706783
P7_Vglut2_cKO1-3_c1+2_c1+2	cKO1	cKO	P7	1		P7	Control	Ctrl3	0.853592	0.776411
P7_Vglut2_cKO1-4_c1+2	cKO1	cKO	P7	1		P7	cKO	cKO1	1
P7_Vglut2_cKO1-4_c1+2_c1+2	cKO1	cKO	P7	1		P7	cKO	cKO2	1		Fold-Change
P7_Vglut2_cKO1-5_c1+2	cKO1	cKO	P7	1		P7	cKO	cKO3	1	1	1.28798
P7_Vglut2_cKO1-5_c1+2_c1+2	cKO1	cKO	P7	1		P14	Control	Ctrl1	0.33476
P7_Vglut2_cKO2-1_c1+2	cKO2	cKO	P7	1		P14	Control	Ctrl2	0.1783
P7_Vglut2_cKO2-1_c1+2_c1+2	cKO2	cKO	P7	1		P14	Control	Ctrl3	0.48554	0.332867
P7_Vglut2_cKO2-2_c1+2	cKO2	cKO	P7	1		P14	cKO	cKO1	1
P7_Vglut2_cKO2-2_c1+2_c1+2	cKO2	cKO	P7	1		P14	cKO	cKO2	1		Fold-Change
P7_Vglut2_cKO2-3_c1+2	cKO2	cKO	P7	1		P14	cKO	cKO3	1	1	3.00421
P7_Vglut2_cKO3-2_c1+2	cKO3	cKO	P7	1
P7_Vglut2_cKO3-3_c1+2	cKO3	cKO	P7	1
P7_Vglut2_cKO3-4_c1+2	cKO3	cKO	P7	1
P7_Vglut2_cKO3-5_c1+2	cKO3	cKO	P7	1
P7_Vglut2_Ctrl1-1_c1+2	Ctrl1	Ctrl	P7	0.909091
P7_Vglut2_Ctrl1-2_c1+2	Ctrl1	Ctrl	P7	0.928571
P7_Vglut2_Ctrl1-3_c1+2	Ctrl1	Ctrl	P7	0.860465
P7_Vglut2_Ctrl1-4_c1+2	Ctrl1	Ctrl	P7	0.846154
P7_Vglut2_Ctrl1-5_c1+2	Ctrl1	Ctrl	P7	0.3
P7_Vglut2_Ctrl2-1_c1+2_c1+2	Ctrl2	Ctrl	P7	0.434783
P7_Vglut2_Ctrl2-2_c1+2_c1+2	Ctrl2	Ctrl	P7	0.714286
P7_Vglut2_Ctrl2-3_c1+2_c1+2	Ctrl2	Ctrl	P7	0.818182
P7_Vglut2_Ctrl2-4_c1+2_c1+2	Ctrl2	Ctrl	P7	0.9
P7_Vglut2_Ctrl2-5_c1+2_c1+2	Ctrl2	Ctrl	P7	0.666667
P7_Vglut2_Ctrl3-1_c1+2_c1+2	Ctrl3	Ctrl	P7	0.833333
P7_Vglut2_Ctrl3-2_c1+2_c1+2	Ctrl3	Ctrl	P7	0.931034
P7_Vglut2_Ctrl3-3+4_c1+2_c1+2	Ctrl3	Ctrl	P7	0.75
P7_Vglut2_Ctrl3-5_c1+2_c1+2	Ctrl3	Ctrl	P7	0.9
P14_Vglut2_cKO1-1_c1+2	cKO1	cKO	P14	1
P14_Vglut2_cKO1-2_c1+2	cKO1	cKO	P14	1
P14_Vglut2_cKO1-3_c1+2	cKO1	cKO	P14	1
P14_Vglut2_cKO1-4_c1+2	cKO1	cKO	P14	1
P14_Vglut2_cKO1-5_c1+2	cKO1	cKO	P14	1
P14_Vglut2_cKO2-1_c1+2	cKO1	cKO	P14	1
P14_Vglut2_cKO2-2_c1-2	cKO1	cKO	P14	1
P14_Vglut2_cKO2-3_c1-2	cKO2	cKO	P14	1
P14_Vglut2_cKO2-4_c1-2	cKO2	cKO	P14	1
P14_Vglut2_cKO2-5_c1-2.	cKO2	cKO	P14	1
P14_Vglut2_cKO3-1_c1-2	cKO2	cKO	P14	1
P14_Vglut2_cKO3-2_c1-2	cKO2	cKO	P14	1
P14_Vglut2_cKO3-3_c1-2	cKO3	cKO	P14	1
P14_Vglut2_cKO3-4_c1-2	cKO3	cKO	P14	1
P14_Vglut2_cKO3-5_c1-2	cKO3	cKO	P14	1
P14_Vglut2_Control1-1_c1+2	Ctrl1	Ctrl	P14	0.3637
P14_Vglut2_Control1-2_c1+2	Ctrl1	Ctrl	P14	0.3333
P14_Vglut2_Control1-3_c1+2	Ctrl1	Ctrl	P14	0.2353
P14_Vglut2_Control1-4_c1+2	Ctrl1	Ctrl	P14	0.28
P14_Vglut2_Control1-5_c1+2	Ctrl1	Ctrl	P14	0.4615
P14_Vglut2_Control2-1_c1+2	Ctrl2	Ctrl	P14	0.2105
P14_Vglut2_Control2-2_c1+2	Ctrl2	Ctrl	P14	0.174
P14_Vglut2_Control2-3_c1+2	Ctrl2	Ctrl	P14	0.12
P14_Vglut2_Control2-4_c1+2	Ctrl2	Ctrl	P14	0.1765
P14_Vglut2_Control2-5_c1+2	Ctrl2	Ctrl	P14	0.2105
P14_Vglut2_Control3-1_c1+2	Ctrl3	Ctrl	P14	0.4286
P14_Vglut2_Control3-2_c1+2	Ctrl3	Ctrl	P14	0.3704
P14_Vglut2_Control3-3_c1+2	Ctrl3	Ctrl	P14	0.2778
P14_Vglut2_Control3-4_c1+2	Ctrl3	Ctrl	P14	0.6667
P14_Vglut2_Control3-5_c1+2	Ctrl3	Ctrl	P14	0.6842

## Sheet: Stats - Area
Source Sum Sq. d.f. Mean Sq. F Prob>F
-----------------------------------------------------
X1 34.1957 1 34.1957 77.68 0
X2 3.5264 1 3.5264 8.01 0.0221
X1*X2 5.2289 1 5.2289 11.88 0.0087
Error 3.5215 8 0.4402
Total 46.4724 11
X1=Genotype
X2=Age
Post-Hoc
Group1	Group2	P-value
Ctrl P7	cKO P7	0.022
Ctrl P7	Ctrl P14	0.0094
Ctrl P7	cKO P14	0.0123
cKO P7	Ctrl P14	0.0002
cKO P7	cKO P14	0.9706
Ctrl P14	cKO P14	0.0001

## Sheet: Stats - Area (2)
Source Sum Sq. d.f. Mean Sq. F Prob>F
-----------------------------------------------------
X1 0.59504 1 0.59504 81.98 0
X2 0.14755 1 0.14755 20.33 0.002
X1*X2 0.14755 1 0.14755 20.33 0.002
Error 0.05807 8 0.00726
Total 0.9482 11
X1=Genotype
X2=Age
Post-Hoc
Group1	Group2	P-value
Ctrl P7	cKO P7	0.0492
Ctrl P7	Ctrl P14	0.001
Ctrl P7	cKO P14	0.0492
cKO P7	Ctrl P14	0.0001
cKO P7	cKO P14	1
Ctrl P14	cKO P14	0.0001
