# Supplementary material for: Maturation of Purkinje cell firing properties relies on neurogenesis of excitatory neurons
Source: eLife. 2021 Sep 20;10:e68045. doi: 10.7554/eLife.68045 (PMC8452305; doi:10.7554/eLife.68045)
Supplement: Figure 8—source data 1. [file elife-68045-fig8-data1.xlsx]

## Sheet: ePhys SS data
CellID	Type	CellNum	MouseID	Genotype	Age	Age Group	RecordTime	SpikeNum	CS Freq	Doublet freq	a CS
32	PC	1	P7_190124	ctrl	P7	Ctrl-p07-08	284.933	250	0	0.169581	0.169581
34	PC	1	P7_190212	ctrl	P7	Ctrl-p07-08	292.829	261	0.00748996	0.0861345	0.0936245
50	PC	4	P7_191010	ctrl	P7	Ctrl-p07-08	161.942	304	0	0.110424	0.110424
51	PC	5	P7_191010	ctrl	P7	Ctrl-p07-08	130.215	358	0	0.0672609	0.0672609
61	PC	4	P7_191018	ctrl	P7	Ctrl-p07-08	198.792	590	0.0059958	0.0359748	0.0419706
119	PC	1	P7_200110	ctrl	P7	Ctrl-p07-08	292.53	372	0.243881	0.250849	0.494729
120	PC	2	P7_200110	ctrl	P7	Ctrl-p07-08	299.109	242	0.104071	0	0.104071
121	PC	3	P7_200110	ctrl	P7	Ctrl-p07-08	299.287	275	0.0670694	0	0.0670694
125	PC	9	P7_200129	ctrl	P7	Ctrl-p07-08	109.969	1340	0.0732399	0	0.0732399
126	PC	5	P7_200129	ctrl	P7	Ctrl-p07-08	199.373	673	0.0401855	0	0.0401855
151	PC	1	P7_191018	ctrl	P7	Ctrl-p07-08	228.405	651	0.122589	0	0.122589
37	PC	1	P8_190225	ctrl	P8	Ctrl-p07-08	149.516	345	0	0.349612	0.349612
38	PC	2	P8_190225	ctrl	P8	Ctrl-p07-08	123.549	971	0	0.114257	0.114257
127	PC	4	P8_200218	ctrl	P8	Ctrl-p07-08	199.492	562	0.0202309	0.0101155	0.0303464
128	PC	5	P8_200219	ctrl	P8	Ctrl-p07-08	229.783	615	0.0174645	0.00873224	0.0261967
129	PC	6	P8_200220	ctrl	P8	Ctrl-p07-08	204.4	648	0.161948	0.00981503	0.171763
134	PC	1	P8_200219	ctrl	P8	Ctrl-p07-08	99.6274	305	0.0316697	0	0.0316697
135	PC	3	P8_200219-2	ctrl	P8	Ctrl-p07-08	239.848	404	0.0499418	0.167986	0.217928
139	PC	4	P8_200311	ctrl	P8	Ctrl-p07-08	149.723	969	0.0335682	0.449814	0.483382
140	PC	4	P8_200311-2	ctrl	P8	Ctrl-p07-08	263.611	885	0.10682	0.00381502	0.110635
141	PC	5	P8_200311-2	ctrl	P8	Ctrl-p07-08	198.303	327	0.260367	0	0.260367
142	PC	6	P8_200311	ctrl	P8	Ctrl-p09-10	149.568	813	0.0952431	0.136062	0.231305
72	PC	6	P9_191120	ctrl	P9	Ctrl-p09-10	119.971	846	0.418747	0	0.418747
73	PC	8	P9_191120	ctrl	P9	Ctrl-p09-10	119.769	1533	0	0.138468	0.138468
74	PC	9	P9_191120	ctrl	P9	Ctrl-p09-10	99.9259	1879	0.412906	0.055798	0.468704
75	PC	1	P9_191120	ctrl	P9	Ctrl-p09-10	149.908	1190	0.0802513	0.00668761	0.0869389
118	PC	4	P9_M1_200108	ctrl	P9	Ctrl-p09-10	149.874	1548	0.244787	0	0.244787
130	PC	7	P9_200218	ctrl	P9	Ctrl-p09-10	143.963	545	0.0488029	0.00697184	0.0557747
131	PC	6	P9_200218	ctrl	P9	Ctrl-p09-10	100.523	186	0.031011	0	0.031011
132	PC	5	P9_200218	ctrl	P9	Ctrl-p09-10	204.956	897	0.383994	0.004923	0.388917
133	PC	3	P9_200218	ctrl	P9	Ctrl-p09-10	209.666	567	0.0389108	0	0.0389108
143	PC	6	P9_200312F3	ctrl	P9	Ctrl-p09-10	208.705	1057	0.0480053	0.220824	0.268829
144	PC	5	P9_200312F3	ctrl	P9	Ctrl-p09-10	210.225	574	0.1052	0.0047818	0.109981
145	PC	4	P9_200312F3	ctrl	P9	Ctrl-p09-10	198.763	328	0.040372	0	0.040372
146	PC	2	P9_200312F3	ctrl	P9	Ctrl-p09-10	199.332	375	0.0702348	0.00501677	0.0752515
147	PC	7	P9_200312F4	ctrl	P9	Ctrl-p09-10	201.059	626	0.0845521	0.00497365	0.0895258
148	PC	5	P9_200312F4	ctrl	P9	Ctrl-p09-10	148.095	919	0.0205933	0.0411867	0.06178
149	PC	6	P9_200312F4	ctrl	P9	Ctrl-p09-10	99.8768	874	0.0972309	0.0324103	0.129641
49	PC	2	P10_191008	ctrl	P10	Ctrl-p09-10	199.445	1597	1.13528	0.0301402	1.16542
70	PC	3	P10_191028	ctrl	P10	Ctrl-p09-10	199.97	1151	0.0309456	0.266132	0.297077
71	PC	4	P10_191028	ctrl	P10	Ctrl-p09-10	199.047	789	0.0919457	0.0306486	0.122594
76	PC	1	P10_191125	ctrl	P10	Ctrl-p09-10	99.9407	932	0.228465	0.0103848	0.23885
86	PC	4	P10_191212	ctrl	P10	Ctrl-p09-10	152.977	766	0.0744324	0	0.0744324
87	PC	6	P10_191212	ctrl	P10	Ctrl-p09-10	199.921	2951	0.140422	0	0.140422
88	PC	3	P10_191212	ctrl	P10	Ctrl-p09-10	149.928	1571	0.298557	0.0192618	0.317819
89	PC	1	P10_191212	ctrl	P10	Ctrl-p09-10	149.939	2043	0.166784	0	0.166784
122	PC	3	P10_200128	ctrl	P10	Ctrl-p09-11	199.904	1337	0.0889243	0.0111155	0.10004
123	PC	4	P10_200128	ctrl	P10	Ctrl-p09-10	179.928	1416	0.117424	0	0.117424
124	PC	9	P10_200128	ctrl	P10	Ctrl-p09-10	99.8834	1014	0.0963887	0.0481944	0.144583
136	PC	3	P10_200113	ctrl	P10	Ctrl-p09-10	149.961	1113	0.110196	0.376505	0.486701
137	PC	2	P10_191101	ctrl	P10	Ctrl-p09-10	109.059	669	0.084588	0	0.084588
152	PC	5	P10_191212	ctrl	P10	Ctrl-p09-10	99.9404	857	0.799568	0	0.799568
30	PC	2	P11_190118	ctrl	P11	Ctrl-p11-12	299.95	8795	0.145089	0	0.145089
31	PC	2	P11_190118	ctrl	P11	Ctrl-p11-12	299.96	2623	0.783738	0	0.783738
33	PC	1	P11_190207	ctrl	P11	Ctrl-p11-12	295.82	1739	0.205593	0	0.205593
52	PC	1	P10_191014	ctrl	P11	Ctrl-p11-12	199.88	2255	0.10006	0	0.10006
53	PC	6	P10_191014	ctrl	P11	Ctrl-p11-12	199.952	2002	0.22138	0	0.22138
54	PC	8	P10_191014	ctrl	P11	Ctrl-p11-12	199.948	9252	0.432088	0	0.432088
55	PC	10	P10_191014	ctrl	P11	Ctrl-p11-12	149.962	3090	0.240061	0	0.240061
90	PC	2	P11_F_191223	ctrl	P11	Ctrl-p11-12	116.744	1948	0.238994	0	0.238994
91	PC	3	P11_F_191223	ctrl	P11	Ctrl-p11-12	99.9649	1635	0.161087	0	0.161087
92	PC	4	P11_F_191223	ctrl	P11	Ctrl-p11-12	108.99	1478	0.153556	0	0.153556
93	PC	7	P11_F_191223	ctrl	P11	Ctrl-p11-12	102.755	1067	0.0988945	0	0.0988945
94	PC	8	P11_F2_191223	ctrl	P11	Ctrl-p11-12	99.1636	1433	0.186063	0	0.186063
95	PC	6	P11_F2_191223	ctrl	P11	Ctrl-p11-12	99.6761	1235	0.137551	0	0.137551
96	PC	4	P11_F2_191223	ctrl	P11	Ctrl-p11-12	99.2526	1207	0.324868	0	0.324868
97	PC	2	P11_F2_191223	ctrl	P11	Ctrl-p11-12	111.82	2275	0.175822	0.0376762	0.213499
98	PC	3	P11_M3_191223	ctrl	P11	Ctrl-p11-12	129.933	1533	0.108423	0	0.108423
99	PC	4	P11_M3_191223	ctrl	P11	Ctrl-p11-12	199.065	1362	0.491735	0.00528748	0.497023
100	PC	5	P11_M3_191223	ctrl	P11	Ctrl-p11-12	134.501	2350	0.243482	0.0167919	0.260274
101	PC	3	P11_M4_200102	ctrl	P11	Ctrl-p11-12	165.393	1964	0.0604621	0.0120924	0.0725545
102	PC	5	P11_M4_200102	ctrl	P11	Ctrl-p11-12	199.585	1116	0.025052	0.265551	0.290603
62	PC	1	P12_191023M	ctrl	P12	Ctrl-p11-12	199.303	2143	0.0653187	0	0.0653187
63	PC	11	P12_191023M	ctrl	P12	Ctrl-p11-12	198.165	2238	0.448888	0.005101	0.453989
64	PC	8	P12_191023M	ctrl	P12	Ctrl-p11-12	98.3247	1729	0.492221	0	0.492221
65	PC	2	P12_191023M	ctrl	P12	Ctrl-p11-12	99.9867	1604	0.142506	0.020358	0.162864
66	PC	2	P12_191023M2	ctrl	P12	Ctrl-p11-12	199.966	6353	0.331206	0.00509548	0.336302
67	PC	3	P12_191023M2	ctrl	P12	Ctrl-p11-12	114.825	4057	0.469676	0	0.469676
68	PC	5	P12_191023M2	ctrl	P12	Ctrl-p11-12	199.98	11203	0.768187	0	0.768187
69	PC	7	P12_191023M2	ctrl	P12	Ctrl-p11-12	199.926	6068	0.440525	0	0.440525
82	PC	4	P12_191127	ctrl	P12	Ctrl-p11-12	199.308	1357	0.115484	0	0.115484
83	PC	6	P12_191127	ctrl	P12	Ctrl-p11-12	206.194	1574	0.179312	0	0.179312
84	PC	7	P12_191127	ctrl	P12	Ctrl-p11-12	149.962	2265	0.140657	0	0.140657
85	PC	8	P12_191127	ctrl	P12	Ctrl-p11-12	99.819	574	0.176139	0	0.176139
104	PC	3	P12_M3_200102	ctrl	P12	Ctrl-p11-12	199.944	1054	0.161269	0	0.161269
105	PC	2	P12_M3_200102	ctrl	P12	Ctrl-p11-12	99.9496	2706	0.553188	0	0.553188
150	PC	9	P12_191023M	ctrl	P12	Ctrl-p11-12	99.4223	1441	0.192979	0.0101568	0.203136
56	PC	1	P13F_19101	ctrl	P13	Ctrl-p13-14	199.735	2589	0.171929	0.00614031	0.178069
57	PC	4	P13F_19101	ctrl	P13	Ctrl-p13-14	199.935	2025	0.0836184	0.00522615	0.0888446
59	PC	6	P13F_19101	ctrl	P13	Ctrl-p13-14	199.978	3110	0.170831	0.0061011	0.176932
60	PC	8	P13F_19101	ctrl	P13	Ctrl-p13-14	199.567	3720	0.329983	0	0.329983
106	PC	1	P13_F4_200104	ctrl	P13	Ctrl-p13-14	532.129	1880	0.0321868	0	0.0321868
107	PC	6	P13_F4_200104	ctrl	P13	Ctrl-p13-14	250.703	1721	0.0955161	0	0.0955161
108	PC	7	P13_F4_200105	ctrl	P13	Ctrl-p13-14	109.537	1717	0.0552911	0	0.0552911
109	PC	8	P13_F4_200106	ctrl	P13	Ctrl-p13-14	99.9808	2582	0.373054	0	0.373054
110	PC	1	P13_F3_200104	ctrl	P13	Ctrl-p13-14	142.388	2986	0.24445	0	0.24445
111	PC	2	P13_F3_200104	ctrl	P13	Ctrl-p13-14	159.968	2310	0.258879	0	0.258879
112	PC	3	P13_F3_200105	ctrl	P13	Ctrl-p13-14	119.958	2119	0.433866	0	0.433866
113	PC	6	P13_F3_200106	ctrl	P13	Ctrl-p13-14	99.9733	1721	0.239526	0	0.239526
114	PC	1	P13_F2_200104	ctrl	P13	Ctrl-p13-14	182.355	3431	1.33601	0.0058341	1.34184
115	PC	2	P13_F2_200104	ctrl	P13	Ctrl-p13-14	129.915	2649	0.564891	0	0.564891
116	PC	3	P13_F2_200104	ctrl	P13	Ctrl-p13-14	139.86	1264	0.626802	0	0.626802
117	PC	4	P13_F2_200104	ctrl	P13	Ctrl-p13-14	149.413	2355	0.805577	0.00813714	0.813714
13	PC	1	ctrl2	ctrl	P14	Ctrl-p13-14	199.926	2058	0.410551	0.0150202	0.425571
14	PC	5	ctrl2	ctrl	P14	Ctrl-p13-14	199.992	3760	0.560172	0	0.560172
15	PC	6	ctrl2	ctrl	P14	Ctrl-p13-14	299.717	6213	0.12347	0.00333702	0.126807
16	PC	1	ctrl3	ctrl	P14	Ctrl-p13-14	308.25	2346	0.0356853	0	0.0356853
17	PC	3	ctrl3	ctrl	P14	Ctrl-p13-14	243.327	4351	0.111888	0	0.111888
18	PC	1	ctrl4	ctrl	P14	Ctrl-p13-14	299.965	3282	0.0467576	0.00667965	0.0534372
19	PC	2	ctrl4	ctrl	P14	Ctrl-p13-14	355.789	4297	0.123784	0.00281327	0.126597
20	PC	3	ctrl4	ctrl	P14	Ctrl-p13-14	263.058	4394	0.106708	0	0.106708
21	PC	1	ctrl5	ctrl	P14	Ctrl-p13-14	231.15	2895	0.234181	0.00867336	0.242854
22	PC	2	ctrl5	ctrl	P14	Ctrl-p13-14	226.788	2671	0.0485217	0.00441107	0.0529328
23	PC	4	ctrl5	ctrl	P14	Ctrl-p13-14	200.235	2372	0.0249917	0.014995	0.0399868
24	PC	5	ctrl5	ctrl	P14	Ctrl-p13-14	251.895	3976	0.239459	0	0.239459
25	PC	3	ctrl6	ctrl	P14	Ctrl-p13-14	194.679	2763	0.0256833	0	0.0256833
26	PC	4	ctrl6	ctrl	P14	Ctrl-p13-14	142.46	2848	0.0772145	0	0.0772145
27	PC	1	ctrl7	ctrl	P14	Ctrl-p13-14	260.282	3323	0.281737	0	0.281737
28	PC	2	ctrl7	ctrl	P14	Ctrl-p13-14	300.765	1838	0.0201132	0.00335221	0.0234655
185	PC	8	P10_cKO1M	cKO	P10	cKO-p10	300.332	3417	0.0993822	1.43184	1.53122
186	PC	1	P10_cKO1M	cKO	P10	cKO-p10	107.861	701	0.038343	0.268401	0.306744
187	PC	4	P10_cKO1M	cKO	P10	cKO-p10	109.62	822	0.0590443	0.423151	0.482195
188	PC	6	P10_cKO1M	cKO	P10	cKO-p10	199.541	1382	0.117587	0.993611	1.1112
189	PC	5	P10_cKO2F	cKO	P10	cKO-p10	298.735	1068	0.017122	0.0993078	0.11643
190	PC	6	P10_cKO2F	cKO	P10	cKO-p10	300.493	1978	0.027019	0.391776	0.418795
191	PC	7	P10_cKO2F	cKO	P10	cKO-p10	119.559	433	0	0.13764	0.13764
192	PC	8	P10_cKO2F	cKO	P10	cKO-p10	198.471	529	0.0108791	0.0815931	0.0924721
193	PC	3	P10_cKO3M	cKO	P10	cKO-p10	99.8986	357	0.0205381	0.0616142	0.0821523
194	PC	9	P10_cKO3M	cKO	P10	cKO-p10	98.2016	251	0.0103063	0.793586	0.803893
195	PC	6	P10_cKO3M	cKO	P10	cKO-p10	199.904	1349	0.0309079	0.00515132	0.0360592
196	PC	10	P10_cKO3M	cKO	P10	cKO-p10	149.727	525	0	0.0405362	0.0405362
197	PC	11	P10_cKO3M	cKO	P10	cKO-p10	89.8708	391	0	0.211584	0.211584
198	PC	12	P10_cKO3M	cKO	P10	cKO-p10	149.142	603	0.110392	0.00689953	0.117292
199	PC	13	P10_cKO3M	cKO	P10	cKO-p10	169.857	467	0.00630591	0.0252236	0.0315295
1	PC	1	cKO1	cKO	P14	cKO-p14	180.03	577	0.0113252	0.0226504	0.0339755
3	PC	3	cKO1	cKO	P14	cKO-p14	226.167	1035	0.0227675	0.0409815	0.063749
4	PC	1	cKO2	cKO	P14	cKO-p14	75.5794	576	0.0666183	0.0666183	0.133237
5	PC	2	cKO2	cKO	P14	cKO-p14	151.387	272	0.0221817	0.0591513	0.081333
6	PC	1	cKO3	cKO	P14	cKO-p14	161.726	929	0.0125695	0.0942715	0.106841
7	PC	2	cKO3	cKO	P14	cKO-p14	518.142	3837	0.0380931	1.80561	1.84371
8	PC	1	cKO4	cKO	P14	cKO-p14	149.938	722	0.00724111	1.49891	1.50615
9	PC	2	cKO4	cKO	P14	cKO-p14	313.049	1413	0.0170714	0.679441	0.696512
10	PC	2	cKO5	cKO	P14	cKO-p14	99.8671	265	0.0714411	0.1735	0.244941
11	PC	3	cKO5	cKO	P14	cKO-p14	149.916	1361	0.176808	0.068003	0.244811
77	PC	1	cKO_F_191125	cKO	P14	cKO-p14	199.068	462	0.0618885	0.0309443	0.0928328
78	PC	2	cKO_F_191125	cKO	P14	cKO-p14	147.284	613	0.279394	0.183052	0.462446
79	PC	3	cKO_F_191125	cKO	P14	cKO-p14	173.965	903	0.189997	0.805586	0.995582
80	PC	4	cKO_F_191125	cKO	P14	cKO-p14	198.787	833	0.206784	0.790644	0.997428
81	PC	5	cKO_F_191125	cKO	P14	cKO-p14	201.396	950	0.0638883	0.425922	0.48981
							Average
			Genotype	Age Group	N	n	RecordTime	SpikeNum	CS Freq	Doublet freq	a CS
			ctrl	Ctrl-P07-08	13	21	207.392	540.333	0.0641206	0.087351	0.151472
			ctrl	Ctrl-P09-10	12	30	156.804	1054.2	0.186528	0.047979	0.234507
			ctrl	Ctrl-P11-12	11	35	162.211	2763.57	0.263187	0.0108032	0.27399
			ctrl	Ctrl-P13-14	14	32	215.427	2861.44	0.259166	0.00283502	0.262001
			cKO	cKO-P10	3	15	172.748	951.533	0.0365218	0.331461	0.367983
			cKO	cKO-P14	6	15	196.42	983.2	0.0832046	0.449686	0.53289
							ANOVA Post Hoc p-values
							Group 1	Group 2	CS Freq	Doublet freq	a CS
							Ctrl P7-P8	Ctrl P9-P10	0.255241	0.981268	0.950436
							Ctrl P7-P8	Ctrl P11-P12	0.00354762	0.809799	0.699203
							Ctrl P7-P8	Ctrl P13-P14	0.00588274	0.752892	0.797971
							Ctrl P7-P8	cKO P10	0.998023	0.0216209	0.285743
							Ctrl P7-P8	cKO P14	0.999823	4.65233e-05	0.00261939
							Ctrl P9-P10	Ctrl P11-P12	0.62966	0.992669	0.992174
							Ctrl P9-P10	Ctrl P13-P14	0.701854	0.982147	0.998437
							Ctrl P9-P10	cKO P10	0.162769	0.0011417	0.701373
							Ctrl P9-P10	cKO P14	0.572442	3.98043e-07	0.0192514
							Ctrl P11-P12	Ctrl P13-P14	0.999999	0.999992	0.999985
							Ctrl P11-P12	cKO P10	0.00304567	9.83828e-05	0.915703
							Ctrl P11-P12	cKO P14	0.0395179	1.04299e-08	0.0615714
							Ctrl P13-P14	cKO P10	0.00469047	7.84386e-05	0.873233
							Ctrl P13-P14	cKO P14	0.0533313	8.86082e-09	0.04814
							cKO P10	cKO P14	0.987757	0.725415	0.668399
