# Supplementary material for: Maturation of Purkinje cell firing properties relies on neurogenesis of excitatory neurons
Source: eLife. 2021 Sep 20;10:e68045. doi: 10.7554/eLife.68045 (PMC8452305; doi:10.7554/eLife.68045)
Supplement: Figure 9—source data 1. [file elife-68045-fig9-data1.xlsx]

## Sheet: Righting reflex
MouseID	Dob	Ear Punch	Gender	Genotype	P6	P8	P10		Kruskal-Wallis results:		P6	1=Cre; 2=cKO; 3=Flox; 4=FlpO
MEH25	43550	R	60	Cre	6.255	4.715	1.215				1.0000 2.0000 -18.5539 -2.1909 14.1721 0.9860
MEH26	43550	L	F	cKO	23	3.56	3.79				1.0000 3.0000 -4.1057 11.4000 26.9057 0.2328
MEH27	43550	R	M	Cre	15.085	1.725	1.19				1.0000 4.0000 -12.9888 2.3000 17.5888 0.9804
MEH28	43550	L	M	Flox	2.76	2.52	1.44				2.0000 3.0000 -1.4980 13.5909 28.6798 0.0948
MEH29	43550	RL	M	FlpO	2.28	3.445	1.375				2.0000 4.0000 -10.3751 4.4909 19.3569 0.8653
MEH30	43550	t	M	cKO	51	17.5	4.04				3.0000 4.0000 -23.0168 -9.1000 4.8168 0.3343
MEH31	43550	tR	M	Flox	31.18	1.96	1.16
MEH32	43550	tL	M	Cre	2.805	3.125	1.37				P8
MEH33	43550	tRL	M	Flox	7.665	11.06	1.375				1.0000 2.0000 -28.5189 -12.1667 4.1855 0.2231
MH45	43585	R	F	Flox	22.01	1.71	1.72				1.0000 3.0000 -10.9910 4.8214 20.6338 0.8621
MH46	43585	L	F	FlpO	15.44	1.74	1.72				1.0000 4.0000 -16.3079 -0.7167 14.8746 0.9994
MH47	43585	RL	F	FlpO	8.52	8.53	1.605				2.0000 3.0000 1.9640 16.9881 32.0122 0.0192
MH48	43585	tR	F	FlpO	9.385	3.765	1.195				2.0000 4.0000 -3.3411 11.4500 26.2411 0.1922
MH49	43585	tL	F	Cre	4.75	6.14	1.57				3.0000 4.0000 -19.7301 -5.5381 8.6540 0.7479
MH50	43585	R	M	cKO	3.255	15.28	2.39
MH51	43585	L	M	Flox	6.125	4.155	1.2				P10
MH52	43585	RL	M	Cre	29.515	2.335	1.72				1.0000 2.0000 -29.8996 -13.5500 2.7996 0.1438
MH57	43593	L	F	Cre	3.325	1.35	0.845				1.0000 3.0000 -5.3956 10.4143 26.2242 0.3277
MH58	43593	RL	F	Flox	2.47	2.2	0.94				1.0000 4.0000 -10.3888 5.2000 20.7888 0.8270
MH59	43593	tR	F	Flox	2.46	0.93	1				2.0000 3.0000 8.9426 23.9643 38.9860 0.0002
MHF	43593	tL	F	Flox	4.605	2.14	0.88				2.0000 4.0000 3.9612 18.7500 33.5388 0.0062
MH61	43593	R	M	Flox	3.21	1.98	0.98				3.0000 4.0000 -19.4041 -5.2143 8.9755 0.7811
MH62	43593	L	M	cKO	17.345	4.105	2.085
MH63	43593	RL	M	FlpO	31.9	2.08	1.135
MH64	43607	R	F	FlpO	31.46	1.63	3.16
MH65	43607	L	F	Cre	31.675	2.3	2.25
MH66	43607	RL	F	cKO	13.26	2.84	3.38
MH67	43607	t	F	cKO	60	3.21	1.75
MH68	43607	R	M	cKO	30.365	14.41	1.31
MH69	43607	L	M	Cre	59.5	5.175	1.65
MH70	43607	RL	M	FlpO	31.26	1.3	1.6
MH71	43607	t	M	FlpO	3.64	3.605	1
MH72	43607	tR	M	cKO	55.425	3.99	1.53
MH97	43615	R	F	FlpO	48.81	21.86	0.635
MH98	43615	L	F	FlpO	4.74	33.445	0.725
MH99	43615	RL	F	Flox	29.525	2.28	0.94
MH100	43615	R	M	cKO	6.975	25.955	0.95
MH101	43615	L	M	cKO	19.08	31.89	2.49
MH102	43615	RL	M	Flox	5.095	2.435	0.715
MH103	43615	t	M	FlpO	7.44	2.97	0.86
MH104	43615	tR	M	Flox	3.23	3.215	0.76
MH115	43643	R	F	cKO	7.15	3.595	2.02
MH116	43643	L	F	FlpO	5.21	19.975	0.725
MH117	43643	RL	F	Cre	40.175	3.72	1.085
MH118	43643	t	F	Flox	38.175	12.605	0.745
MH119	43643	tR	F	FlpO	2.715	1.51	1.02
MH120	43643	R	M	cKO	39.305	24.125	2.28
MH122	43643	RL	M	Cre	39.21	6.32	0.905
MH123	43643	t	M	FlpO	58.645	1.35	1.205
MH124	43643	tR	M	Flox	2.32	3.335	0.835
MH125	43643	tL	M	FlpO	33.115	31.6	1.055

## Sheet: Ultrasonic vocalizations
MouseID	Genotype	Call #	Mean Call Time (ms)		Kruskal-Wallis results:		p values	call #	1=cKO; 2=Cre; 3=Flox; 4=FlpO
MH159	cKO	28	10.3				1.0000 2.0000 -24.4559 -10.5405 3.3750 0.2089
MH155	cKO	34	11.8				1.0000 3.0000 -32.1613 -16.6571 -1.1530 0.0295
MH313	cKO	35	13.8				1.0000 4.0000 -24.6946 -9.6071 5.4803 0.3584
MH308	cKO	43	15.1				2.0000 3.0000 -21.4040 -6.1167 9.1707 0.7331
MH145	cKO	23	16.1				2.0000 4.0000 -13.9312 0.9333 15.7979 0.9985
MH150	cKO	235	19.4				3.0000 4.0000 -9.3114 7.0500 23.4114 0.6852
MH324	cKO	25	19.6
MH141	cKO	41	21.2				p values	time
MH315	cKO	239	21.3				1.0000 2.0000 -30.2498 -16.3357 -2.4216 0.0136
MH153	cKO	38	21.5				1.0000 3.0000 -32.7384 -17.2357 -1.7330 0.0223
MH309	cKO	159	21.8				1.0000 4.0000 -38.6672 -23.5812 -8.4951 0.0003
MH295	cKO	201	22.3				2.0000 3.0000 -16.1859 -0.9000 14.3859 0.9988
MH146	cKO	71	25.3				2.0000 4.0000 -22.1086 -7.2455 7.6177 0.5934
MH326	cKO	57	28.8				3.0000 4.0000 -22.7053 -6.3455 10.0144 0.7514
MH140	Cre	23	16.1
MH320	Cre	38	16.1
MH147	Cre	197	18.7
MH149	Cre	323	21.2
MH323	Cre	41	22.7
MH160	Cre	137	23
MH319	Cre	174	27.9
MH136	Cre	116	29.2
MH152	Cre	177	29.2
MH314	Cre	208	30.5
MH322	Cre	135	31.9
MH332	Cre	82	38.3
MH139	Cre	222	42.3
MH321	Cre	186	49.5
MH312	Cre	221	54.3
MH318	Flox	180	20.7
MH310	Flox	31	21.3
MH148	Flox	152	23.9
MH151	Flox	249	25.3
MH329	Flox	220	25.4
MH327	Flox	138	25.8
MH333	Flox	253	33.8
MH134	Flox	202	35
MH331	Flox	294	36.1
MH143	Flox	158	42.5
MH317	FlpO	67	22.2
MH294	FlpO	180	26.5
MH138	FlpO	89	27.7
MH328	FlpO	76	30.7
MH311	FlpO	309	31.2
MH330	FlpO	65	32.3
MH135	FlpO	123	33.2
MH325	FlpO	45	34.1
MH154	FlpO	276	35.9
MH316	FlpO	199	37.6
MH142	FlpO	134	43.8

## Sheet: Open field assay
MouseID	Genotype	Total Distance (cm)	Movement Time (min)	Movement Episode Count	speed		Kruskal-Wallis results:		Distance	1=cKO; 2= Cre; 3=Flox; 4=FlpO
MH67_Ft	cKO	6.74	1.365	164	0.000822955				1.0000 2.0000 -12.5090 4.1773 20.8635 0.9180
MH115_FR	cKO	1.1	0.215	85	0.000852713				1.0000 3.0000 -23.2324 -8.0727 7.0870 0.5195
MH72_MtR	cKO	7.4	0.646667	120	0.00190722				1.0000 4.0000 -19.2991 -4.1394 11.0203 0.8965
MH66_FRL	cKO	8.54	0.651667	96	0.00218414				2.0000 3.0000 -27.8409 -12.2500 3.3409 0.1811
MH50	cKO	38.56	1.64167	103	0.00391472				2.0000 4.0000 -23.9075 -8.3167 7.2742 0.5180
MH100_MR	cKO	67.55	2.87	220	0.00392276				3.0000 4.0000 -10.0116 3.9333 17.8782 0.8873
MH62	cKO	32.17	1.18	90	0.00454379
FL_MEH26	cKO	106.6	3.4	212	0.00522549				MoveTime
MH68_MR	cKO	36.26	1.01667	148	0.00594426				1.0000 2.0000 -0.3670 16.3000 32.9670 0.0580
Mt_MEH30	cKO	123.4	1.7	129	0.012098				1.0000 3.0000 -9.4089 5.7333 20.8755 0.7650
MH120_MR	cKO	46.1	0.626667	117	0.0122606				1.0000 4.0000 -6.2422 8.9000 24.0422 0.4314
FR_MEH25	Cre	6.3	0.6	67	0.00175				2.0000 3.0000 -26.1395 -10.5667 5.0062 0.3013
MR_MEH27	Cre	13.8	0.6	32	0.00383333				2.0000 4.0000 -22.9729 -7.4000 8.1729 0.6136
MH49	Cre	10.79	0.446667	23	0.00402612				3.0000 4.0000 -10.7621 3.1667 17.0955 0.9369
MH122_MRL	Cre	21.3	0.516667	95	0.00687097
MH57	Cre	31.41	0.655	51	0.00799237				MoveNum
MtL_MEH32	Cre	101.7	1.6	85	0.0105938				1.0000 2.0000 8.9281 25.6091 42.2901 0.0005
MH69_ML	Cre	58.57	0.903333	33	0.0108063				1.0000 3.0000 7.0542 22.2091 37.3640 0.0010
MH52	Cre	41.02	0.545	28	0.0125443				1.0000 4.0000 11.5542 26.7091 41.8640 0.0000
MH117_FRL	Cre	36.8	0.455	23	0.0134799				2.0000 3.0000 -18.9859 -3.4000 12.1859 0.9437
MH104_MtR	Flox	15.98	0.81	61	0.00328807				2.0000 4.0000 -14.4859 1.1000 16.6859 0.9979
MtRL_MEH33	Flox	37.7	1.2	50	0.00523611				3.0000 4.0000 -9.4405 4.5000 18.4405 0.8406
ML_MEH28	Flox	35.5	1.1	67	0.00537879
MH102_MRL	Flox	49.62	1.19	62	0.00694958				Speed
MH124_MtR	Flox	18.6	0.441667	70	0.00701887				1.0000 2.0000 -25.2416 -8.5545 8.1325 0.5520
MH119_FtR	Flox	54.8	1.26667	58	0.00721053				1.0000 3.0000 -31.2149 -16.0545 -0.8942 0.0330
MH51	Flox	52.85	1.15333	68	0.00763728				1.0000 4.0000 -32.3483 -17.1879 -2.0275 0.0188
MtR_MEH31	Flox	37	0.7	61	0.00880952				2.0000 3.0000 -23.0916 -7.5000 8.0916 0.6040
MH59	Flox	38.63	0.611667	20	0.0105259				2.0000 4.0000 -24.2249 -8.6333 6.9582 0.4852
MH45	Flox	58.93	0.893333	29	0.0109944				3.0000 4.0000 -15.0789 -1.1333 12.8122 0.9968
MH58	Flox	58.09	0.873333	32	0.0110859
MH56	Flox	57.99	0.688333	23	0.0140412
MH61	Flox	209.5	1.905	30	0.018329
MH60	Flox	83.09	0.716667	45	0.0193233
MH99_FRL	Flox	62.52	0.43	42	0.0242326
MH48	FlpO	31.38	1.39833	107	0.00374017
MH47	FlpO	28.04	0.906667	49	0.00515441
MH97_FR	FlpO	69.64	1.61	63	0.00720911
MH125_MtL	FlpO	14.1	0.323333	18	0.00726804
MH46	FlpO	56.68	1.08167	42	0.00873344
MH103_Mt	FlpO	35.48	0.65	32	0.00909744
MH70_MRL	FlpO	74.28	1.33333	47	0.009285
MH98_FL	FlpO	43.51	0.78	18	0.00929701
MH71_Mt	FlpO	65.79	1.105	37	0.00992308
MH63	FlpO	90.84	1.31667	54	0.0114987
MH123_Mt	FlpO	67.9	0.965	24	0.0117271
MH64_FR	FlpO	40.39	0.546667	51	0.012314
MRL_MEH29	FlpO	16.5	0.2	28	0.01375
MH116_FL	FlpO	16	0.183333	21	0.0145455
MH118_Ft	FlpO	15	0.143333	37	0.0174419

## Sheet: Tremor
MouseID	Genotype	Frequency range	0	1	2	3	4	5	6	7	8	9	10	11	12	13	14	15	16	17	18	19	20	21	22	23	24	25	26	27	28	29	30		Average	Max
MEH26	cKO	MH26_FL	0.012698	0.0151069	0.0124899	0.0117371	0.0109031	0.0116527	0.0146707	0.0297676	0.0497302	0.0746193	0.184065	0.749722	4.13291	16.5304	17.7165	11.5497	5.96308	1.60863	0.384208	0.214028	0.737906	1.29446	0.723099	0.376746	0.324165	0.253455	0.173588	0.212425	0.18629	0.149688	0.16453		2.06042	17.7165
MEH28	Flox	MH28_ML	0.066122	0.0396599	0.00736087	0.00798163	0.00892688	0.00983837	0.0123628	0.0233202	0.0542643	0.101235	0.282404	0.739036	1.91501	4.6268	3.62777	1.21244	0.49689	0.273847	0.120846	0.073272	0.172981	0.311245	0.227069	0.127736	0.0959898	0.0806818	0.0868366	0.0651682	0.0646524	0.0796383	0.0916915		0.487196	4.6268
MH51	Flox	MH51_ML	0.0187625	0.0239754	0.0177088	0.0189846	0.0238296	0.0335756	0.0492401	0.0396107	0.0573547	0.0960606	0.159218	0.428652	1.7208	3.67654	3.07782	1.12828	0.325671	0.179004	0.126174	0.0870156	0.134967	0.275683	0.210312	0.118224	0.078999	0.0677083	0.0726588	0.0631937	0.0500228	0.0437928	0.0351394		0.401257	3.67654
MH46	FlpO	MH46_FL	0.045764	0.0411499	0.017773	0.00998305	0.01055	0.0164313	0.0280755	0.0564273	0.123687	0.27011	0.62293	1.31002	3.44096	8.78277	6.78421	1.68518	0.557589	0.339224	0.209097	0.209209	0.429228	0.571498	0.332325	0.199129	0.186165	0.183926	0.172454	0.155407	0.180013	0.160837	0.15623		0.880269	8.78277
MH62	cKO	MH62_ML	0.0135598	0.0318082	0.0182686	0.00796802	0.00711635	0.0083531	0.00962552	0.0128115	0.0206086	0.0437591	0.116884	0.460988	5.17729	20.5239	18.9633	5.2084	1.02271	0.310331	0.163387	0.133102	0.196597	0.442542	0.380503	0.19486	0.12071	0.100265	0.0842968	0.0726789	0.0654732	0.0783259	0.104115		1.74499	20.5239
MH57	Cre	MH57_FL	0.015087	0.0150595	0.0086452	0.00860215	0.00865592	0.0108189	0.0275157	0.0220933	0.0208992	0.0313218	0.0628584	0.107589	0.271852	0.88772	1.44882	0.791242	0.200778	0.0687418	0.0457118	0.0396098	0.0869692	0.2149	0.206037	0.130247	0.0853575	0.0657258	0.0476105	0.0459705	0.050463	0.0647028	0.048447		0.165808	1.44882
MH65	Cre	MH65_FL	0.010304	0.0110068	0.00828103	0.00709571	0.00698916	0.0074364	0.00734112	0.0119179	0.0223723	0.0389627	0.0673901	0.133033	0.38418	0.997501	0.847626	0.29867	0.102232	0.0486537	0.0305146	0.0427555	0.0875482	0.153402	0.149071	0.0887855	0.0631247	0.0540271	0.0363352	0.0321895	0.0420458	0.0494109	0.0436054		0.125284	0.997501
MH69	Cre	MH69_ML	0.0123537	0.0132099	0.0110363	0.0282656	0.0195381	0.00848913	0.00981492	0.0107379	0.0152031	0.0263444	0.0622387	0.183375	0.570486	1.51314	1.7084	0.607938	0.219519	0.109422	0.061765	0.0327172	0.0504198	0.17837	0.197185	0.112489	0.0620906	0.046515	0.0341035	0.0297659	0.0237278	0.0202249	0.0241656		0.193647	1.7084
MH101	cKO	MH101_ML	1.17254	0.600649	0.0108315	0.356978	2.14733	1.37812	0.0947534	0.0386761	0.0819729	0.14066	0.26577	0.770514	4.72905	16.7043	22.861	11.3934	2.97021	0.864951	0.436094	0.258637	0.518204	0.883508	0.977383	0.651799	0.412615	0.308693	0.266692	0.287698	0.336655	0.35706	0.403138		2.34451	22.861
MH98	FlpO	MH98_FL	1.29411	0.655284	0.00766208	0.00875604	0.00974771	0.0289925	0.993987	2.37159	0.666667	0.129285	0.190497	0.431481	1.5383	4.22521	5.44038	2.28497	0.5027	0.199728	0.110857	0.0967194	0.16374	0.401197	0.425091	0.265234	0.171052	0.134623	0.113189	0.127625	0.143744	0.162847	0.137823		0.755906	5.44038
MH116	FlpO	MH116_FL	0.0165714	0.0239376	0.0193721	0.0190189	0.0198123	0.0186834	0.0186591	0.0263498	0.0377528	0.0722051	0.176067	0.404281	0.915738	1.5965	1.8789	0.828658	0.261394	0.0878785	0.0542912	0.0433204	0.0636906	0.143977	0.14531	0.108343	0.0723907	0.061627	0.0580436	0.0494765	0.0517806	0.0486462	0.0594317		0.238132	1.8789
MEH25	Cre	MH25_FR	0.0168207	0.0145589	0.00713306	0.00745528	0.00758328	0.00770856	0.00842611	0.0126433	0.0243402	0.0468384	0.101259	0.348887	0.94467	1.92299	1.26047	0.31664	0.22519	0.137521	0.0568592	0.0545881	0.131366	0.201856	0.137233	0.0931008	0.0698991	0.0600606	0.0702424	0.0830901	0.0926009	0.0975388	0.0940029		0.214631	1.92299
MEH27	Cre	MH27_MR	0.0769768	0.0455222	0.00926698	0.00933957	0.00979869	0.0107225	0.0118936	0.0191913	0.0371802	0.0679158	0.147613	0.345649	1.14892	2.31525	1.61943	0.581028	0.301891	0.165485	0.0708802	0.0508366	0.134595	0.251331	0.219895	0.130278	0.112165	0.11276	0.0916788	0.0839497	0.0763008	0.0615361	0.059142		0.270272	2.31525
MH50	cKO	MH50_MR	0.0126169	0.0218786	0.0184175	0.020955	0.0234363	0.0266649	0.040721	0.0392982	0.037651	0.0685122	0.159534	1.05121	8.62769	20.701	10.8132	1.82142	0.516084	0.247639	0.184265	0.134565	0.246536	0.431594	0.286717	0.179409	0.131047	0.133451	0.10704	0.0753182	0.0718643	0.0737879	0.0723983		1.496	20.701
MH45	Flox	MH45_FR	0.0150053	0.0222528	0.0203296	0.0195979	0.0315319	0.0355583	0.0305491	0.0292984	0.0405893	0.0648481	0.140124	0.282684	0.698908	1.47786	0.874465	0.298934	0.14743	0.11331	0.0791121	0.0586908	0.130162	0.231229	0.177869	0.0961214	0.0732445	0.0863956	0.0870314	0.0741683	0.073249	0.0599866	0.0636471		0.181748	1.47786
MH61	Flox	MH61_MR	0.0267072	0.0285808	0.00943025	0.00734127	0.00661215	0.00691226	0.00672757	0.00722856	0.00768782	0.00806349	0.00882793	0.0171048	0.0864356	0.381489	0.279701	0.0570132	0.0257875	0.0181321	0.0159304	0.0122067	0.0146932	0.0321734	0.0349069	0.0238114	0.0237766	0.0232211	0.0164839	0.0114448	0.010479	0.0141935	0.0162053		0.0399777	0.381489
MH56	Flox	MH56_FR	0.0223064	0.0230521	0.0140072	0.018424	0.0188285	0.0137822	0.0121823	0.0121227	0.0162572	0.0285996	0.050338	0.164206	0.510175	1.29447	1.55423	0.710971	0.25783	0.156068	0.0748823	0.0496159	0.0757287	0.210233	0.229008	0.136178	0.0927638	0.058253	0.0483007	0.049495	0.0588315	0.0642412	0.0578551		0.196233	1.55423
MH68	cKO	MH68_MR	0.0132117	0.0225124	0.020034	0.021661	0.0372027	0.046197	0.025971	0.0211955	0.0338622	0.0707743	0.417198	1.41607	2.98619	7.59607	6.32358	1.85486	0.68948	0.346821	0.176719	0.0867791	0.168296	0.502652	0.468703	0.275677	0.171444	0.103147	0.0939202	0.102168	0.0886172	0.0724263	0.0639353		0.784431	7.59607
MH64	FlpO	MH64_FR	0.0208648	0.017957	0.00912722	0.0104014	0.00981721	0.0104087	0.0092571	0.00969734	0.0161972	0.0363463	0.134991	0.241739	0.456693	1.28176	1.19069	0.496745	0.183137	0.0638519	0.0410469	0.0347602	0.0814141	0.21643	0.179454	0.100663	0.0619212	0.0557595	0.0456905	0.0527012	0.0688034	0.0832588	0.0684294		0.170646	1.28176
MH100	cKO	MH100_MR	0.966596	0.490989	0.0178359	1.16637	2.43541	0.322383	0.0146705	0.0276648	0.039612	0.0474105	0.0817543	0.257651	1.76309	5.86955	5.96175	2.25731	0.635645	0.234328	0.107874	0.0707768	0.116066	0.242563	0.304086	0.218562	0.120525	0.0931302	0.10306	0.107653	0.0785782	0.077591	0.0921658		0.784602	5.96175
MH97	FlpO	MH97_FR	1.49086	0.754369	0.00869427	0.00736448	0.0103356	0.275236	1.51131	1.77738	0.374109	0.117258	0.212626	0.406041	0.665487	1.71084	1.77711	0.579772	0.292203	0.154007	0.0651137	0.0551237	0.108133	0.176249	0.247213	0.160789	0.106696	0.0774638	0.0645364	0.0566574	0.0762875	0.0871513	0.0667273		0.434618	1.77738
MH120	cKO	MH120_MR	0.0285739	0.0495977	0.0555233	0.0656533	0.0676924	0.0611776	0.0651826	0.0697282	0.0875322	0.159294	0.519242	1.41142	2.71082	4.30316	5.22686	2.06239	0.615061	0.416555	0.259185	0.138034	0.166528	0.332735	0.347506	0.25708	0.183556	0.13293	0.128663	0.104465	0.0969471	0.107007	0.125339		0.656627	5.22686
MH115	cKO	MH115_FR	0.0154831	0.0146419	0.00898763	0.00822731	0.00944416	0.0129877	0.011751	0.0129048	0.0167553	0.0268779	0.0760396	1.0326	5.43241	5.76303	2.88341	0.984519	0.306895	0.163028	0.0918096	0.0574568	0.151038	0.289769	0.330771	0.224587	0.126942	0.113017	0.100658	0.106785	0.152964	0.143082	0.0877251		0.605052	5.76303
MEH29	FlpO	MH29_MRL	0.0402426	0.0253299	0.00793846	0.00864832	0.0123202	0.0207374	0.0341187	0.0718537	0.158333	0.229964	0.357037	0.813532	2.52094	6.17976	5.35855	1.52636	0.686801	0.358374	0.164136	0.240332	0.502187	0.682516	0.446244	0.24611	0.147074	0.122873	0.12668	0.134607	0.112656	0.145918	0.148648		0.697768	6.17976
MH52	Cre	MH52_MRL	0.0222616	0.0180502	0.00799717	0.00823548	0.00856424	0.0109392	0.0138301	0.021759	0.0471848	0.0766722	0.15192	0.428806	1.28701	3.44163	3.02703	0.793737	0.284941	0.170422	0.0849941	0.0873193	0.241216	0.336142	0.218017	0.155661	0.105486	0.0703184	0.0607331	0.0826488	0.108578	0.113323	0.0819842		0.373142	3.44163
MH47	FlpO	MH47_FRL	0.0141515	0.0275718	0.0228473	0.0123796	0.00854742	0.00967904	0.0146269	0.0222408	0.0374738	0.0904648	0.235901	0.672444	1.63124	4.28969	3.53321	1.11532	0.454477	0.258299	0.16508	0.135491	0.24507	0.380029	0.328642	0.191223	0.126211	0.101951	0.105632	0.146349	0.183968	0.12257	0.105475		0.47704	4.28969
MH58	Flox	MH58_FRL	0.0203225	0.0336217	0.0282061	0.0290309	0.0378253	0.0494029	0.0391022	0.0308111	0.0310384	0.0370173	0.047434	0.0869258	0.189991	0.527843	0.593812	0.316896	0.133515	0.0958131	0.0529741	0.0527798	0.0796836	0.139377	0.138578	0.103367	0.0750144	0.0730626	0.0579726	0.0562706	0.0731576	0.071754	0.0449658		0.107986	0.593812
MH63	FlpO	MH63_MRL	0.00995243	0.0141315	0.0151948	0.0151838	0.0156889	0.0119567	0.00828535	0.00993234	0.0107756	0.0147779	0.0348934	0.121719	0.673586	1.60033	1.27303	0.397778	0.118325	0.0651259	0.0385682	0.0642679	0.137579	0.189369	0.157582	0.10378	0.0722987	0.0590895	0.0510686	0.0474683	0.0635076	0.0795117	0.0953154		0.17968	1.60033
MH66	cKO	MH66_FRL	0.0118801	0.012297	0.00878721	0.00812451	0.00851579	0.00877869	0.00915812	0.0104797	0.0222021	0.0538633	0.189234	0.51497	1.65065	5.21226	4.05355	1.28324	0.514252	0.23982	0.126097	0.0893659	0.134074	0.395159	0.400316	0.232174	0.143869	0.108101	0.0773923	0.0663776	0.0725999	0.0773576	0.0699341		0.509835	5.21226
MH70	FlpO	MH70_MRL	0.031852	0.0301005	0.0213661	0.0179085	0.00873659	0.00960971	0.00980204	0.0122239	0.0169355	0.0292822	0.0663512	0.170491	0.532591	1.35338	1.45753	0.553178	0.149642	0.0666157	0.045247	0.0315252	0.0439034	0.13391	0.109122	0.0558078	0.0353605	0.0300079	0.0245036	0.0192378	0.0185625	0.0211331	0.0291356		0.165647	1.45753
MH102	Flox	MH102_MRL	0.149433	0.0799856	0.00791706	0.0130715	0.884749	2.55053	0.522018	0.0202285	0.0490749	0.172128	0.316185	0.513757	1.32801	3.08054	3.0122	1.22522	0.44869	0.210213	0.109248	0.0705842	0.125397	0.229049	0.255659	0.209087	0.164748	0.124899	0.0880011	0.110169	0.141956	0.16111	0.118332		0.532006	3.08054
MH99	Flox	MH99_FRL	1.01588	0.513812	0.008672	0.011041	0.696988	2.5336	0.652045	0.0238342	0.0412447	0.105455	0.218346	0.461831	1.32304	2.95373	3.28202	1.25832	0.318702	0.173799	0.113684	0.066399	0.125116	0.264185	0.298849	0.19337	0.126386	0.094178	0.0784203	0.0835279	0.102181	0.118713	0.0894113		0.559574	3.28202
MH122	Cre	MH122_MRL	0.0454632	0.0557345	0.0458388	0.0366752	0.0351937	0.0390194	0.0474966	0.0679481	0.0715006	0.0627581	0.0880893	0.192856	0.426762	0.705897	0.699558	0.348594	0.165671	0.0888126	0.0597053	0.0627108	0.0626351	0.0902633	0.101347	0.0890919	0.0794066	0.0675026	0.0699085	0.0620234	0.0519209	0.0654762	0.0700307		0.134061	0.705897
MH117	Cre	MH117_FRL	0.0379856	0.05108	0.0500485	0.0530483	0.0496442	0.0515474	0.0439949	0.0518352	0.0503534	0.0625315	0.0736256	0.180795	0.473998	0.907177	0.779738	0.286602	0.147976	0.126548	0.112538	0.0725649	0.0651914	0.121804	0.148815	0.130662	0.0958701	0.0817069	0.0772713	0.0729374	0.0712467	0.0629051	0.0755393		0.150567	0.907177
MEH30	cKO	MH30_Mt	0.0138188	0.0127608	0.00789491	0.00893951	0.00914953	0.0145213	0.0265186	0.0357621	0.0724378	0.156941	0.565014	1.39829	8.17302	31.0063	26.0081	6.39576	1.56858	0.697679	0.383691	0.285719	0.634923	1.06938	0.800878	0.51343	0.369397	0.331213	0.306853	0.257987	0.268688	0.291436	0.277129		2.64394	31.0063
MH67	cKO	MH67_Ft	0.00834907	0.0108943	0.00809984	0.00744236	0.00794475	0.00830158	0.0132784	0.0265404	0.0269862	0.0598196	0.282506	0.587239	0.951619	3.053	3.69307	1.30505	0.392722	0.175174	0.101052	0.0711065	0.103974	0.335334	0.325049	0.195822	0.102994	0.069326	0.0544574	0.0346847	0.0306854	0.0320256	0.0336592		0.390587	3.69307
MH71	FlpO	MH71_Mt	0.0217798	0.0249801	0.0178443	0.0164931	0.0131648	0.00892102	0.00967093	0.00971278	0.0123206	0.0193495	0.0452605	0.1253	0.295612	0.861419	1.20155	0.597141	0.176984	0.0640394	0.0358916	0.0195234	0.0264983	0.0561107	0.0641685	0.0370791	0.0234514	0.0188131	0.017004	0.01365	0.0126686	0.0159429	0.0208203		0.125263	1.20155
MH103	FlpO	MH103_Mt	0.0294915	0.0208567	0.00909671	0.008108	0.00807831	0.031486	0.355476	0.737414	0.757383	0.772337	0.767789	0.912528	1.29574	2.50261	3.17194	1.61874	0.476734	0.205002	0.097895	0.0877662	0.17038	0.309576	0.354168	0.258163	0.166043	0.150288	0.129045	0.133281	0.161279	0.159328	0.125469		0.515596	3.17194
MH118	FlpO	MH118_Ft	0.0222209	0.0182199	0.00749423	0.00748537	0.00802258	0.0102996	0.0166506	0.0270121	0.0331005	0.0467496	0.0752816	0.207911	0.509464	1.23127	1.31466	0.544106	0.166379	0.0942355	0.055105	0.0414343	0.0638711	0.113985	0.115182	0.0756827	0.0585378	0.0576199	0.0385722	0.0321741	0.0379008	0.0430591	0.0356115		0.164816	1.31466
MH123	FlpO	MH123_Mt	0.0169494	0.0159902	0.00790552	0.0077651	0.00827248	0.0095811	0.0150211	0.0339322	0.0620813	0.0706601	0.112291	0.337124	0.882414	1.96574	2.42509	1.01762	0.264807	0.129156	0.099463	0.0492074	0.0671191	0.150343	0.158647	0.112568	0.0825334	0.0566284	0.0379037	0.0422004	0.0512808	0.0420353	0.0638661		0.270845	2.42509
MEH32	Cre	MH32_MLt	0.11297	0.180175	0.156764	0.159587	0.138288	0.118393	0.14363	0.16765	0.222255	0.23858	0.309955	0.497053	1.22133	2.59536	2.0469	0.696662	0.35241	0.299451	0.231724	0.237681	0.39186	0.470362	0.324931	0.246075	0.23328	0.21896	0.185237	0.170467	0.1778	0.20727	0.244853		0.419288	2.59536
MH49	Cre	MH49_FtL	0.0194314	0.0159492	0.00695875	0.00665794	0.00681337	0.00858299	0.0145381	0.0424141	0.0798447	0.152474	0.368233	0.822411	2.31832	5.18611	3.45278	0.885089	0.408643	0.281258	0.148718	0.12091	0.25669	0.382053	0.265087	0.184915	0.119606	0.107421	0.1215	0.130646	0.119289	0.121471	0.108727		0.52463	5.18611
MH60	Flox	MH60_FtL	0.011428	0.0275115	0.018404	0.00944414	0.00751574	0.0072509	0.00868869	0.00949285	0.0123898	0.0244644	0.0658329	0.162952	0.543071	1.39546	1.67464	1.06341	0.345535	0.112395	0.0565152	0.0326314	0.061581	0.166409	0.159843	0.0963932	0.0700118	0.0594147	0.040356	0.0320603	0.0447388	0.0498137	0.0335313		0.206554	1.67464
MH125	FlpO	MH125_MLt	0.0136827	0.0137152	0.00765256	0.00807707	0.0086042	0.0072981	0.00748797	0.0104657	0.0168934	0.0267761	0.0441957	0.117782	0.362914	1.04195	1.33855	0.655177	0.154428	0.0743801	0.040013	0.0351202	0.0444878	0.0872438	0.0850216	0.0607603	0.0517142	0.0371843	0.0303556	0.0397111	0.0443706	0.0432831	0.0414244		0.146797	1.33855
MEH31	Flox	MH31_MRt	0.0436562	0.0304005	0.00923368	0.0101302	0.00978246	0.0107482	0.0159574	0.0239895	0.0462434	0.0799362	0.172234	0.407276	1.27804	2.46059	2.37068	0.903069	0.283316	0.169222	0.0923579	0.0788173	0.171212	0.311531	0.208775	0.127815	0.0897565	0.0686925	0.0625921	0.0721407	0.0766693	0.100661	0.105916		0.319079	2.46059
MH48	FlpO	MH48_FtR	0.0101396	0.0119141	0.00798311	0.00789663	0.00889149	0.0135953	0.0256138	0.0534477	0.10739	0.187277	0.326981	0.816429	2.8686	7.37494	5.44098	1.24414	0.374798	0.25126	0.149934	0.095583	0.195924	0.336008	0.255186	0.142974	0.100629	0.0776081	0.0653186	0.0533133	0.0662001	0.0849584	0.0945801		0.672597	7.37494
MH59	Flox	MH59_FtR	0.0254447	0.0208633	0.024615	0.0216832	0.00982823	0.0130898	0.0164257	0.0283911	0.0596211	0.108479	0.19155	0.393713	1.28344	3.46267	3.83816	1.4359	0.330984	0.180022	0.123769	0.0920246	0.114199	0.258697	0.221166	0.133405	0.0981366	0.0641123	0.0503498	0.047469	0.0730695	0.0881837	0.0693234		0.415445	3.83816
MH104	Flox	MH104_MtR	0.370215	1.89577	1.55211	0.204983	0.0175114	0.00949412	0.0119568	0.0171237	0.02803	0.0573266	0.149207	0.345525	0.975093	1.97255	2.36754	1.27579	0.395644	0.202761	0.0949956	0.0677417	0.116519	0.23371	0.272523	0.183855	0.137317	0.114497	0.104018	0.112934	0.116665	0.124865	0.10942		0.439926	2.36754
MH124	Flox	MH124_MRt	0.00709996	0.00993745	0.00822001	0.00816087	0.00902568	0.00967486	0.00912477	0.0140029	0.0326664	0.056435	0.0898741	0.223862	0.68819	1.25077	1.36274	0.614309	0.181696	0.112713	0.0716	0.0637577	0.0835665	0.126651	0.132961	0.0872723	0.0491905	0.0454134	0.0472907	0.0692574	0.0685817	0.0560578	0.0465243		0.181827	1.36274
MH119	Flox	MH119_FRt	0.0510234	0.0309686	0.00827446	0.00805248	0.00867855	0.013494	0.0245507	0.0577651	0.110122	0.164408	0.257889	0.632525	1.52761	2.55955	2.69581	1.17942	0.398749	0.224891	0.13699	0.091232	0.127869	0.274915	0.27523	0.179431	0.116449	0.0884525	0.0766583	0.068586	0.0612508	0.0731407	0.0955079		0.374822	2.69581
MEH33	Flox	MH33_MR	0.00751361	0.00962081	0.0069647	0.00716891	0.00792624	0.00874152	0.0110596	0.0187345	0.0381343	0.0742212	0.147745	0.497049	1.30141	3.27558	3.04664	1.01641	0.403349	0.251609	0.117925	0.0963817	0.257765	0.434467	0.28582	0.204471	0.134987	0.0903196	0.0809006	0.0898574	0.0915576	0.0991225	0.113932		0.394432	3.27558
		P(kruskalwallis)	0.49868	0.681359	0.7372	0.541592	0.594583	0.726094	0.971343	0.70477	0.905704	0.944304	0.256848	0.00363253	0.000256304	0.000143607	9.02821e-05	3.42136e-05	0.0002409	0.00314542	0.00442504	0.0327904	0.0713222	0.00410523	0.000199776	0.000629665	0.00409397	0.00969235	0.0210039	0.121968	0.310386	0.574344	0.373381		0.00020777	8.796e-05
